# Supplementary material
Source: MDPI journal article supplement (https://www.mdpi.com/2073-4344/12/6/626)
Supplement: s1 [file s1]

Article

# Magnetic Sulfonated Melamine-Formaldehyde Resin as an Efficient Catalyst for the Synthesis of Antioxidant and Antimicrobial Pyrazolone Derivatives

Shefa Mirani Nezhad <sup>1</sup>, Seied Ali Pourmousavi <sup>1</sup>, Ehsan Nazarzadeh Zare <sup>1,\*</sup>, Golnaz Heidari <sup>2</sup> and Pooyan Makvandi <sup>3</sup>

<sup>1</sup> School of Chemistry, Damghan University, Damghan 36716-41167, Iran; shefamirani@yahoo.com (S.M.N.); pourmousavi@gmail.com (S.A.P.)

<sup>2</sup> Department of Chemistry, Faculty of Science, University of Guilan, Rasht 41938-33697, Iran; golnazheidari68@yahoo.com

<sup>3</sup> Istituto Italiano di Tecnologia, Centre for Materials Interfaces, Viale Rinaldo Piaggio 34, 56025 Pontedera, Italy; pooyanmakvandi@gmail.com

\* Correspondence: ehsan.nazarzadehzare@gmail.com or e.nazarzadeh@du.ac.ir

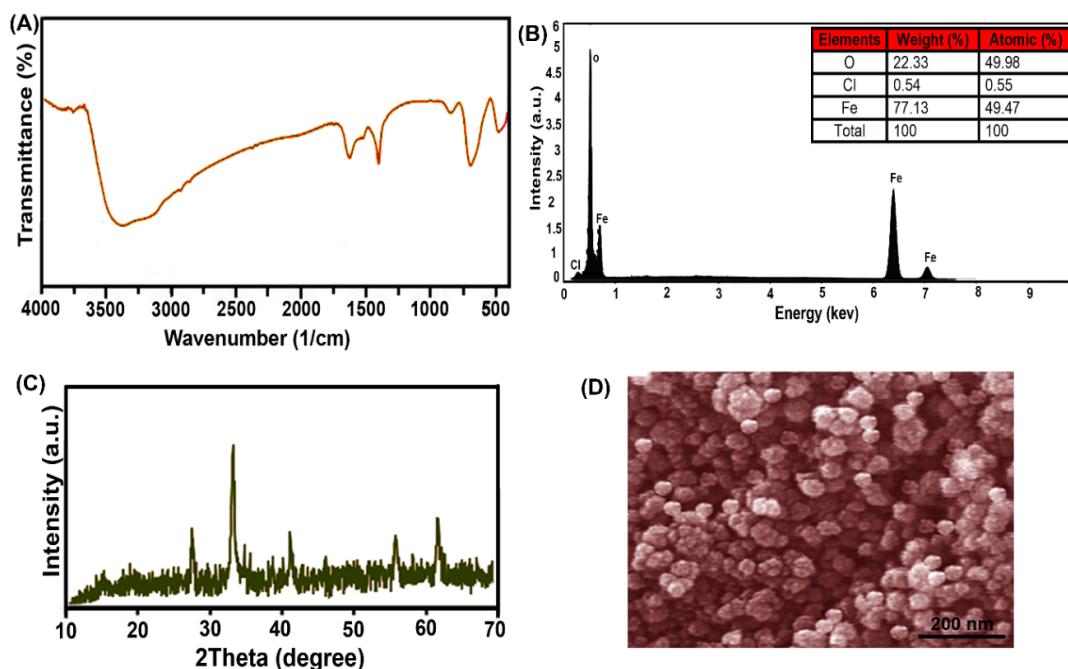

**Figure S1.** FTIR spectrum (A), EDX spectrum (B), XRD pattern (C), and SEM image (D) of Fe<sub>3</sub>O<sub>4</sub> nanoparticles.

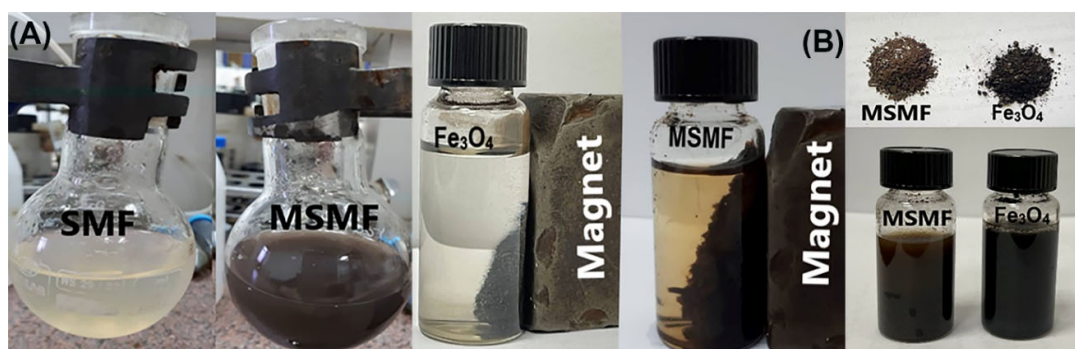

**Figure S2.** mixture of the sulfonated melamine–formaldehyde (SMF) in distilled water, mixture of SMF and Fe<sub>3</sub>O<sub>4</sub> nanoparticles (A), magnetic property of Fe<sub>3</sub>O<sub>4</sub> nanoparticles and MSMF(B).

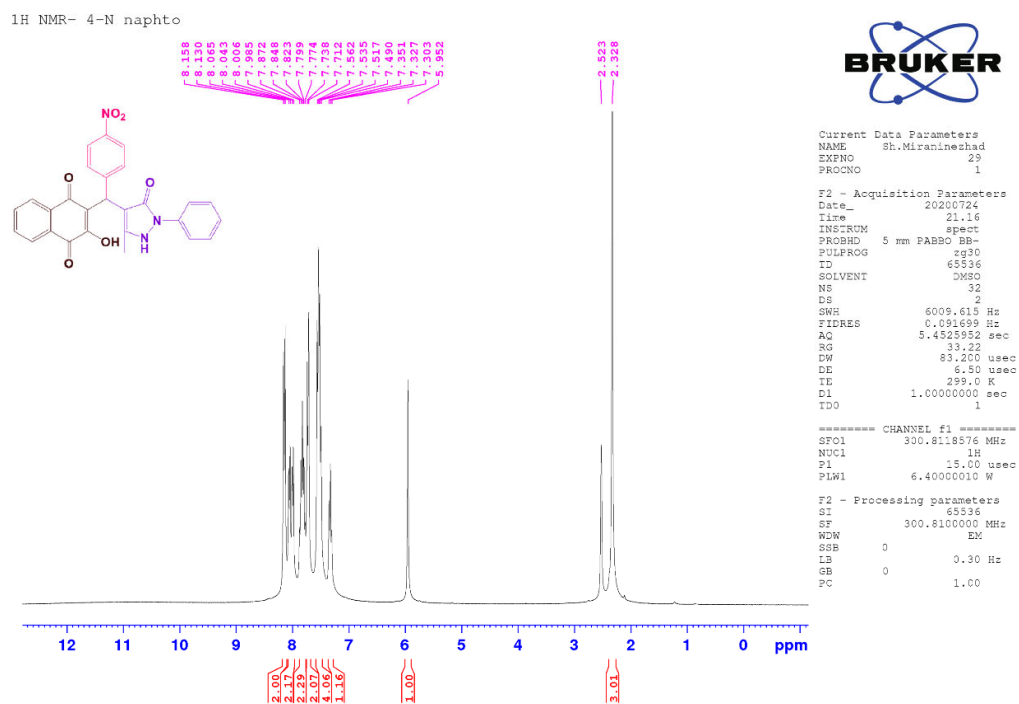

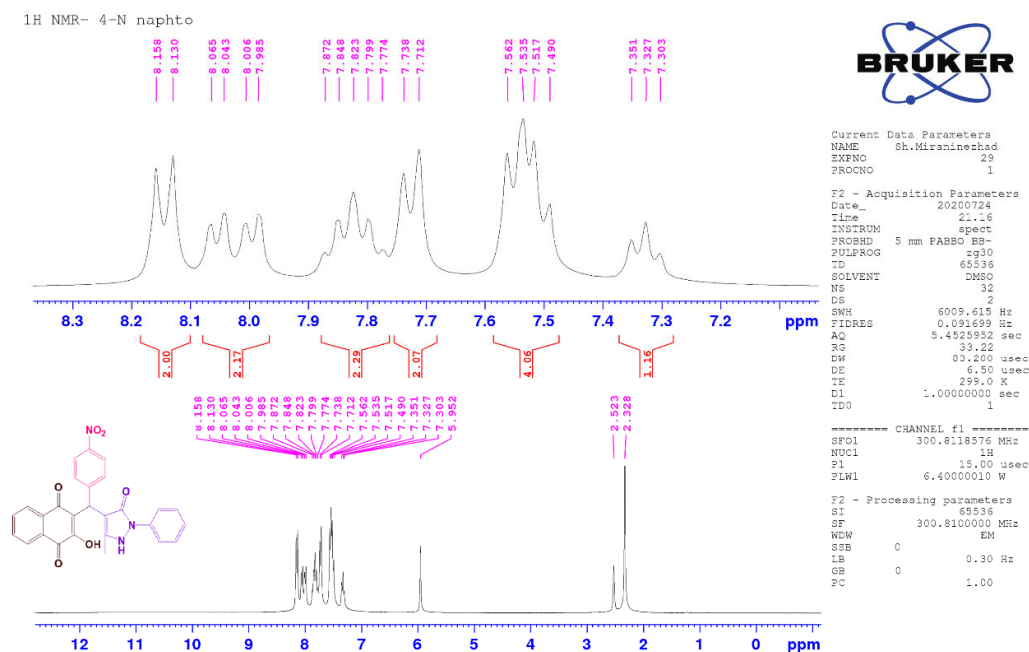Figure S3. <sup>1</sup>H-NMR spectrum of 4e.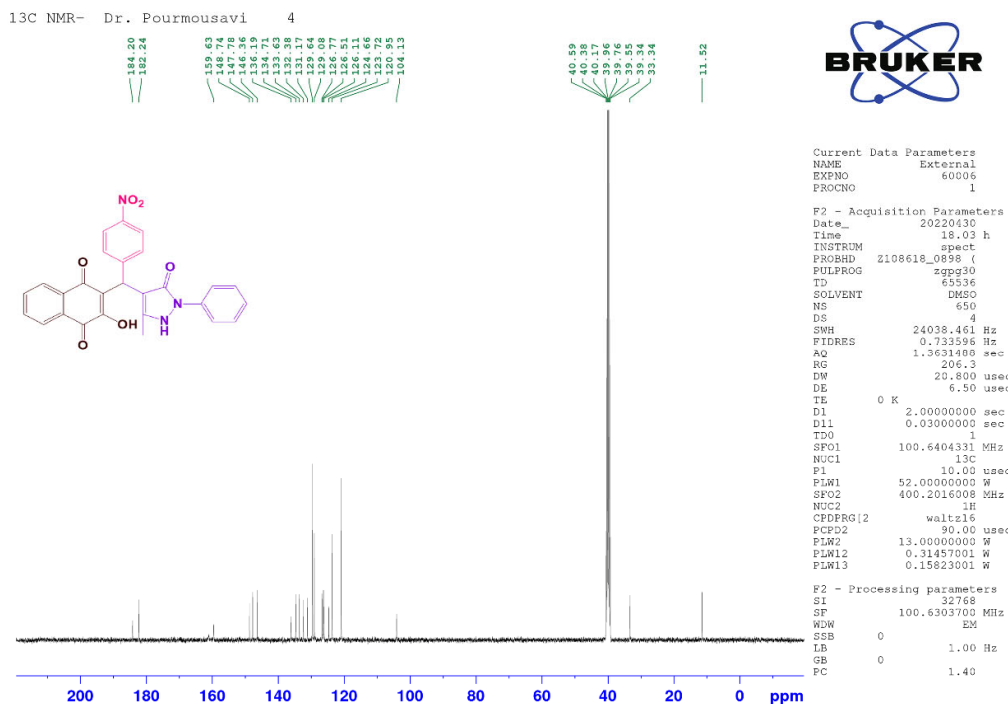Figure S4. <sup>13</sup>C-NMR spectrum of 4e.

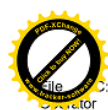

File: C:\MSDCHEM\3\DATA\Snapshot\S-HOSEEINI-4.d  
Operator :  
Acquired : 1 May 2022 12:59 using AcqMethod default.m  
Instrument : DIRECT PROBE  
Sample Name:  
Misc Info :  
Vial Number: 1

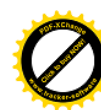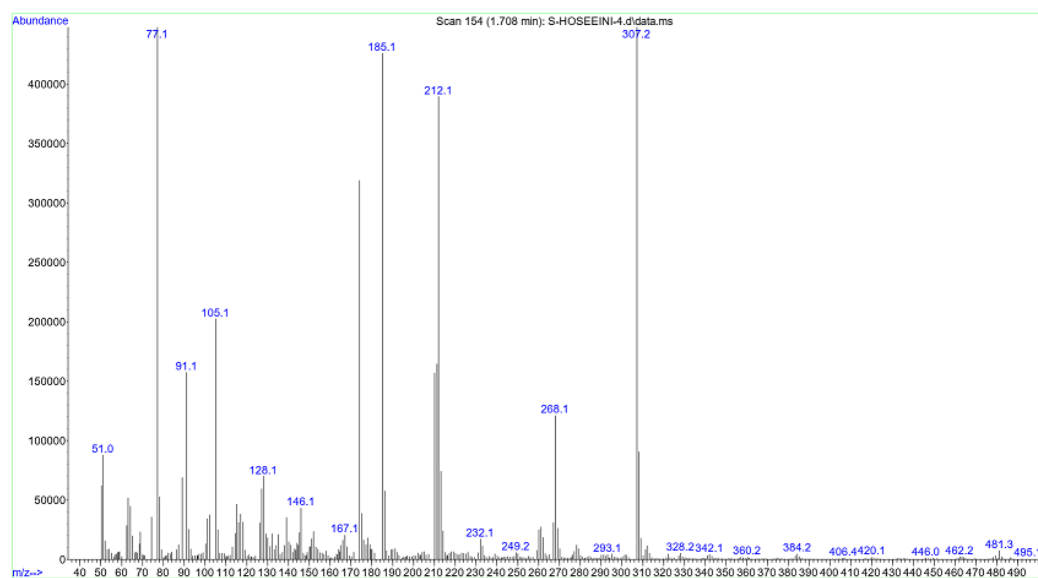

Figure S5. MASS Spectrum of 4e.



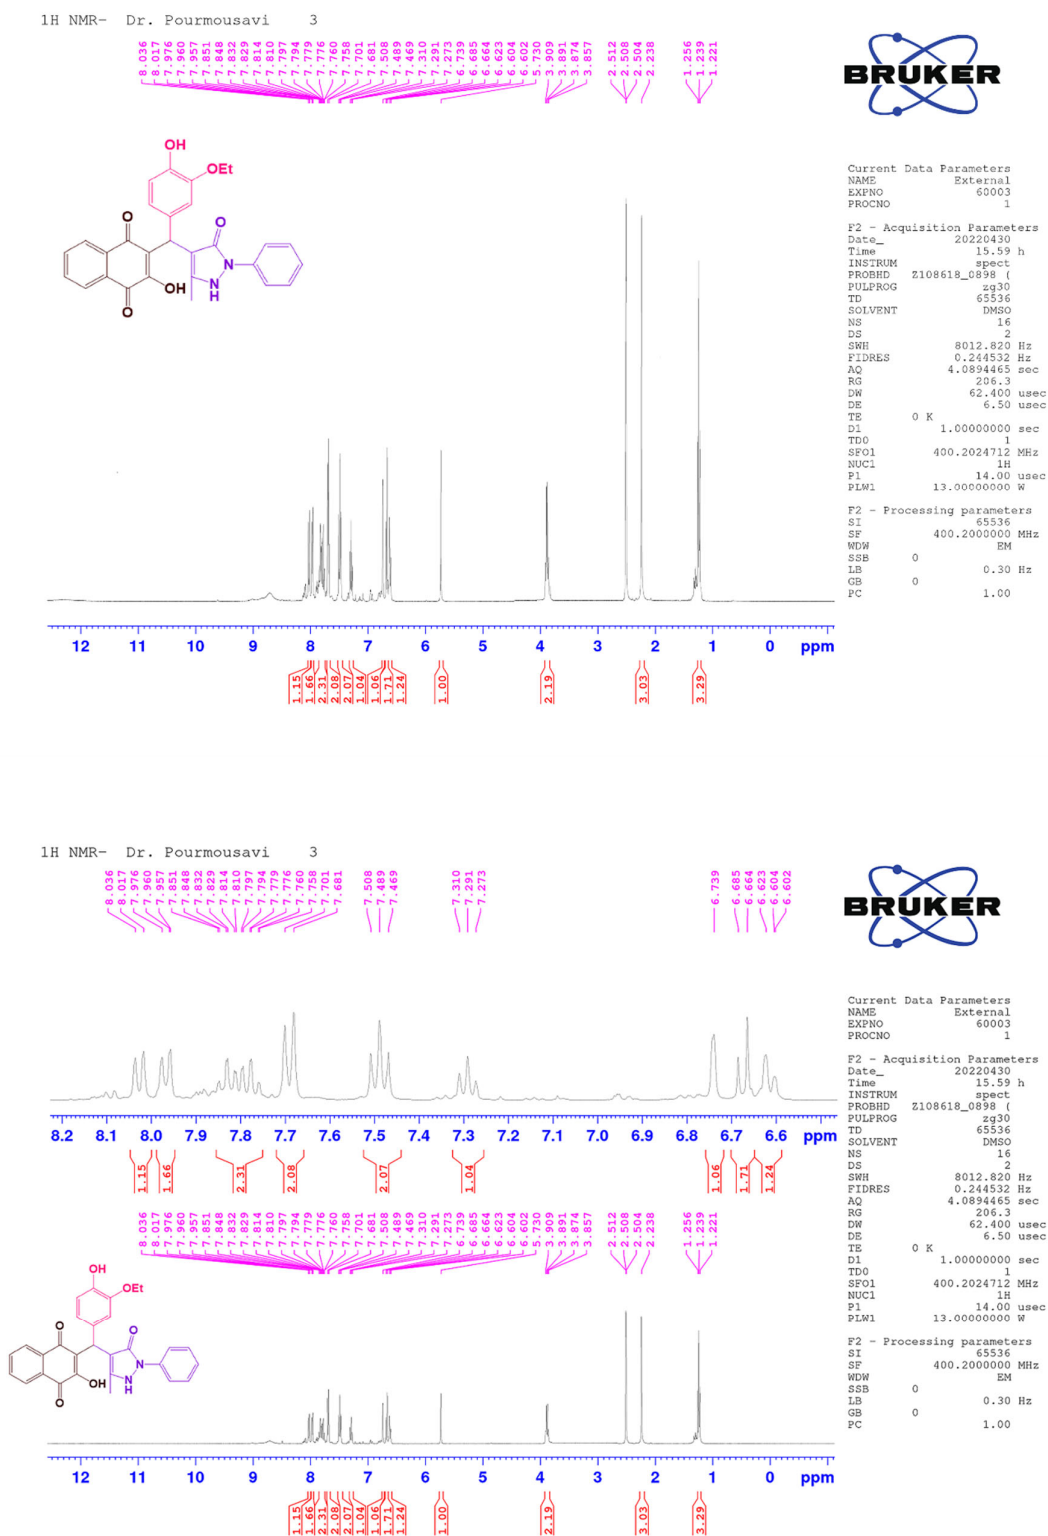Figure S6. <sup>1</sup>H-NMR spectrum of 4j.

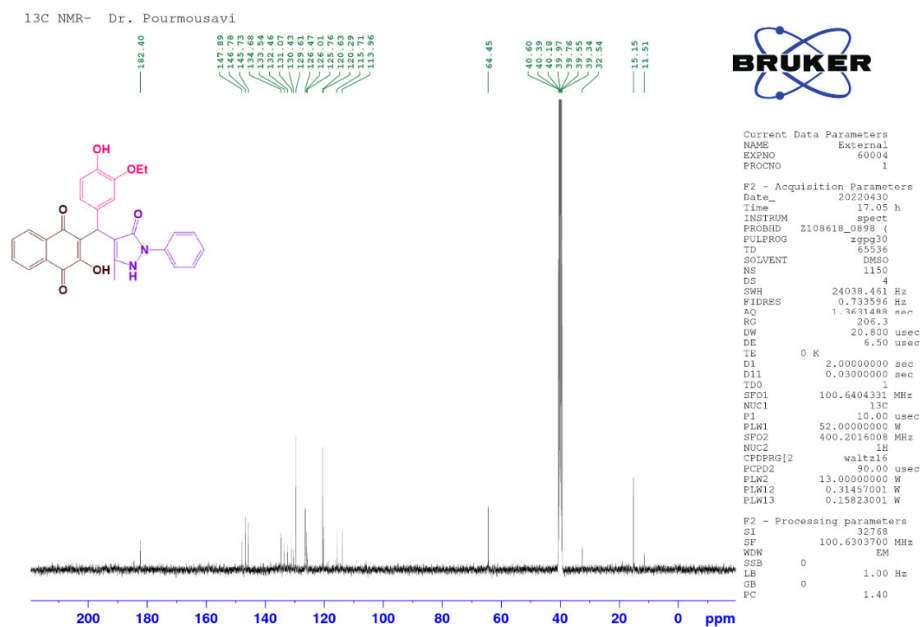Figure S7. <sup>13</sup>C-NMR spectrum of 4j.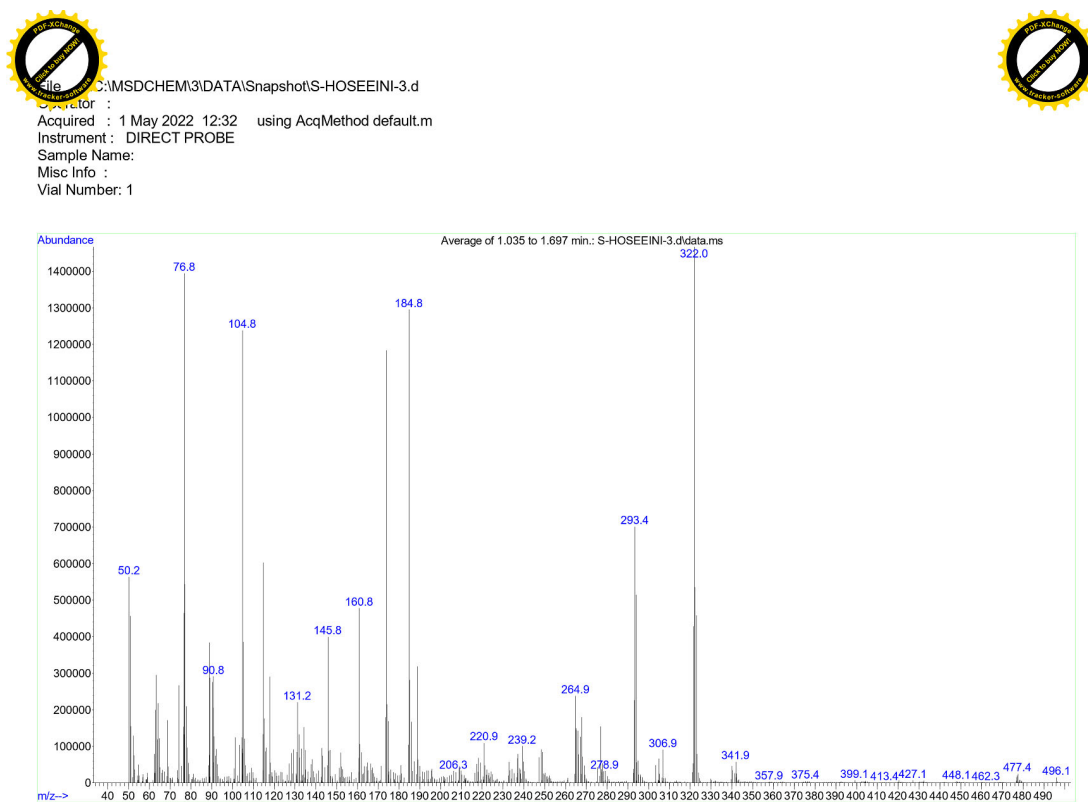

Figure S8. MASS Spectrum of 4j.

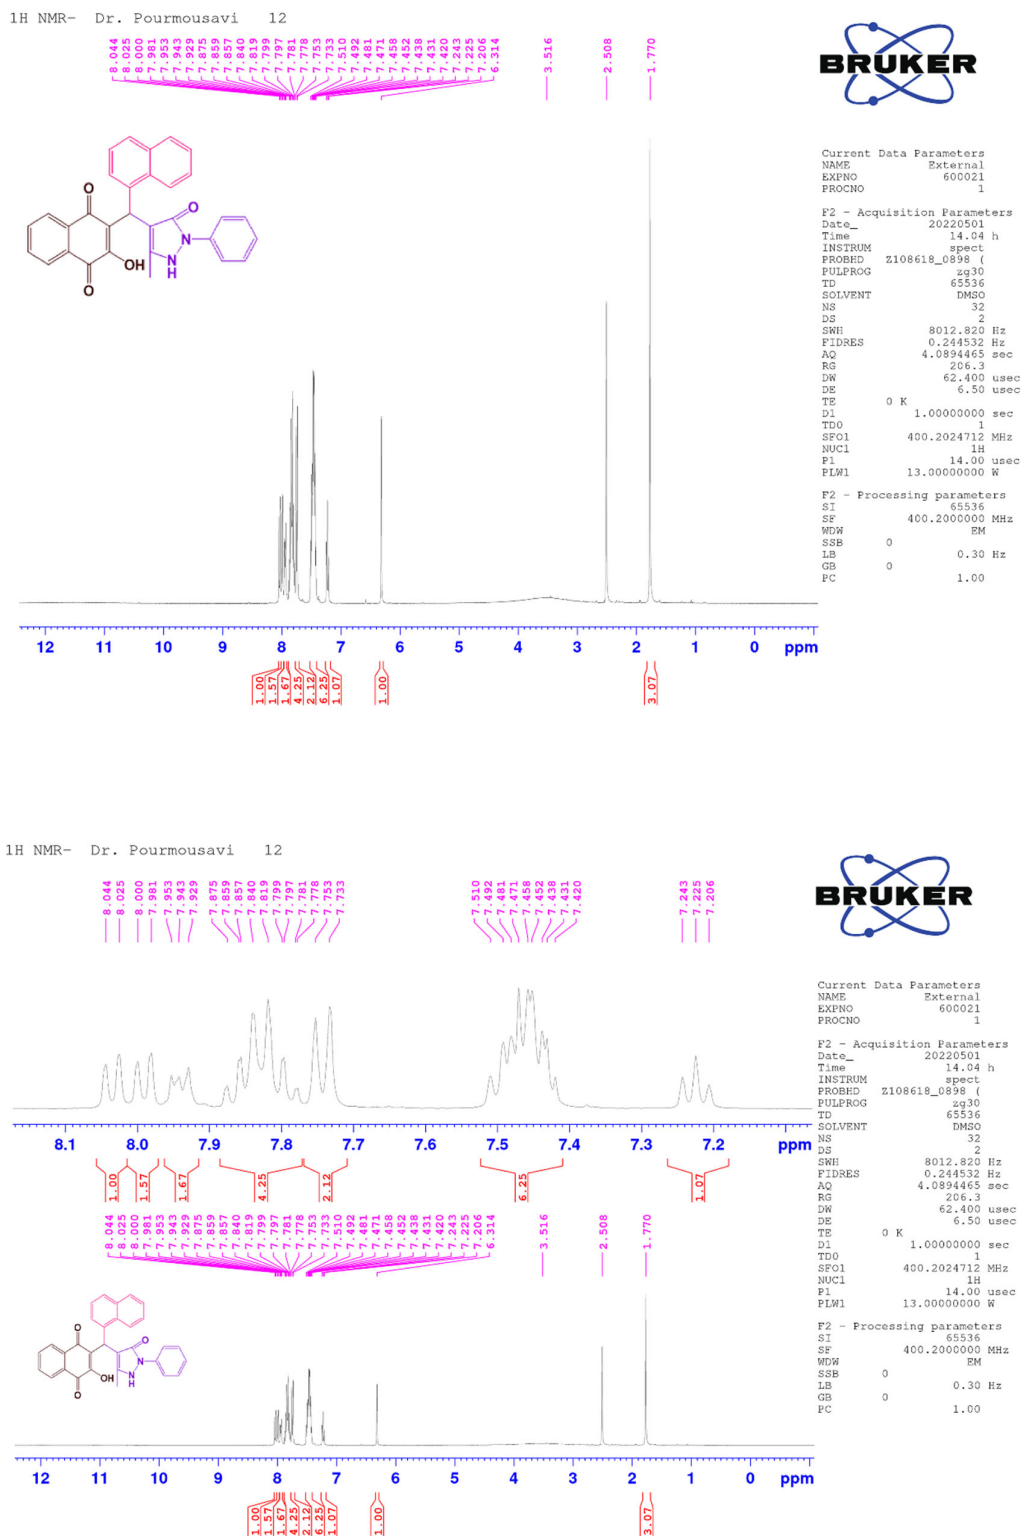Figure S9. <sup>1</sup>H-NMR spectrum of 4k.

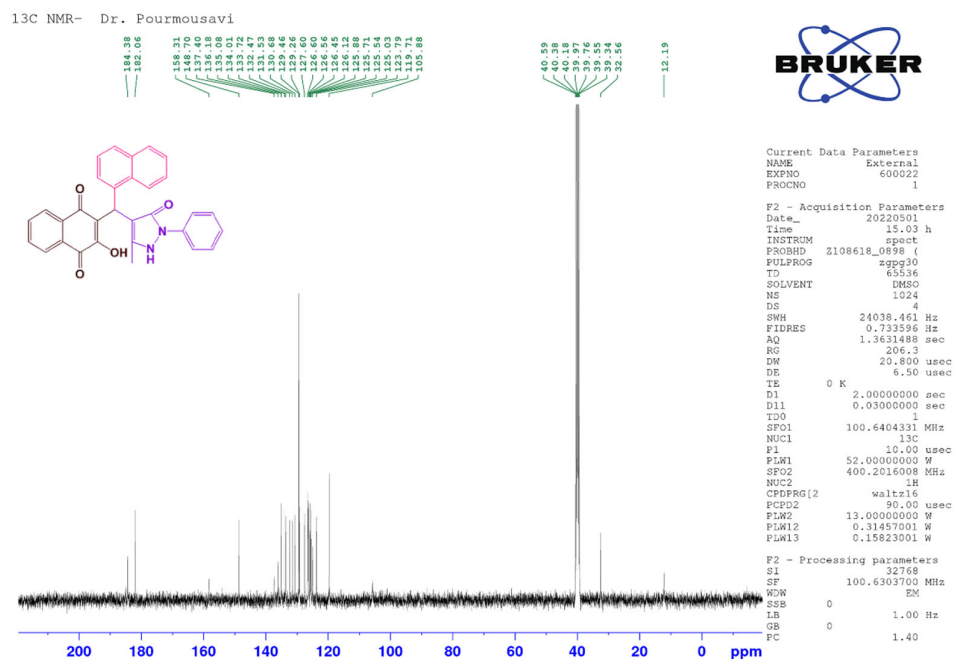Figure S10. <sup>13</sup>C-NMR spectrum of 4k.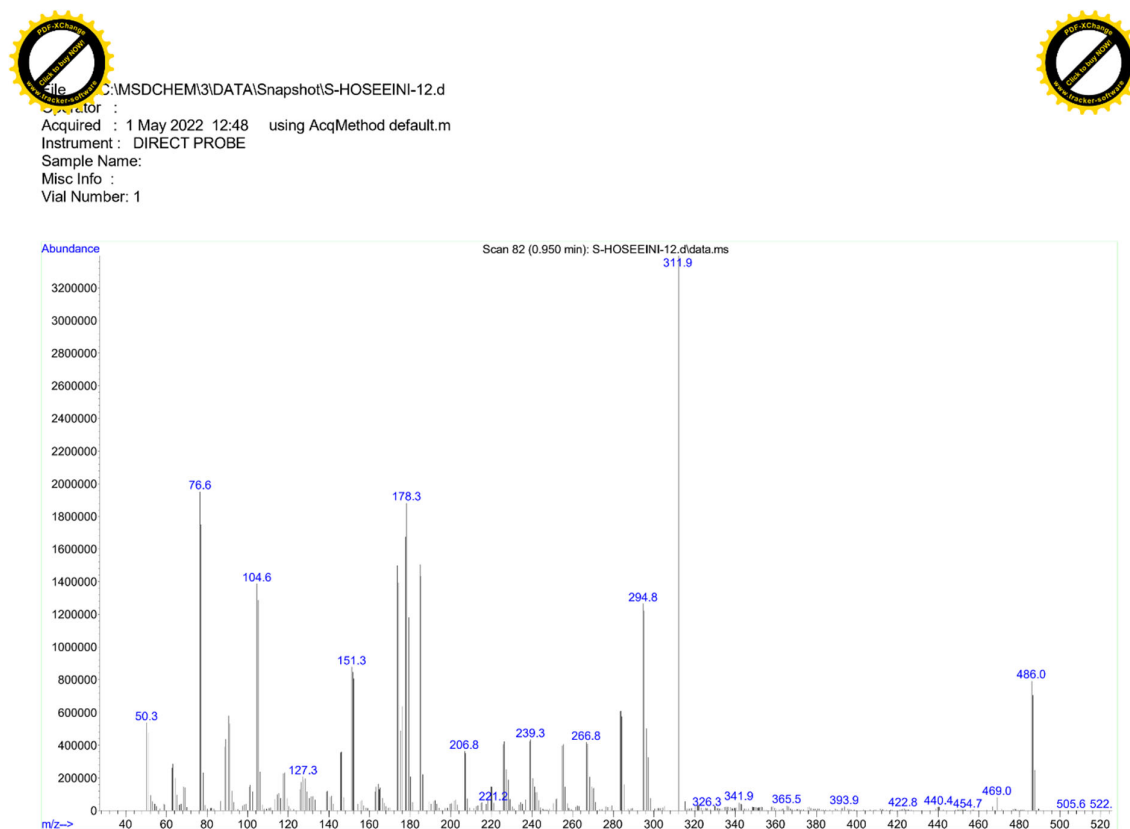

Figure S11. MASS Spectrum of 4k.

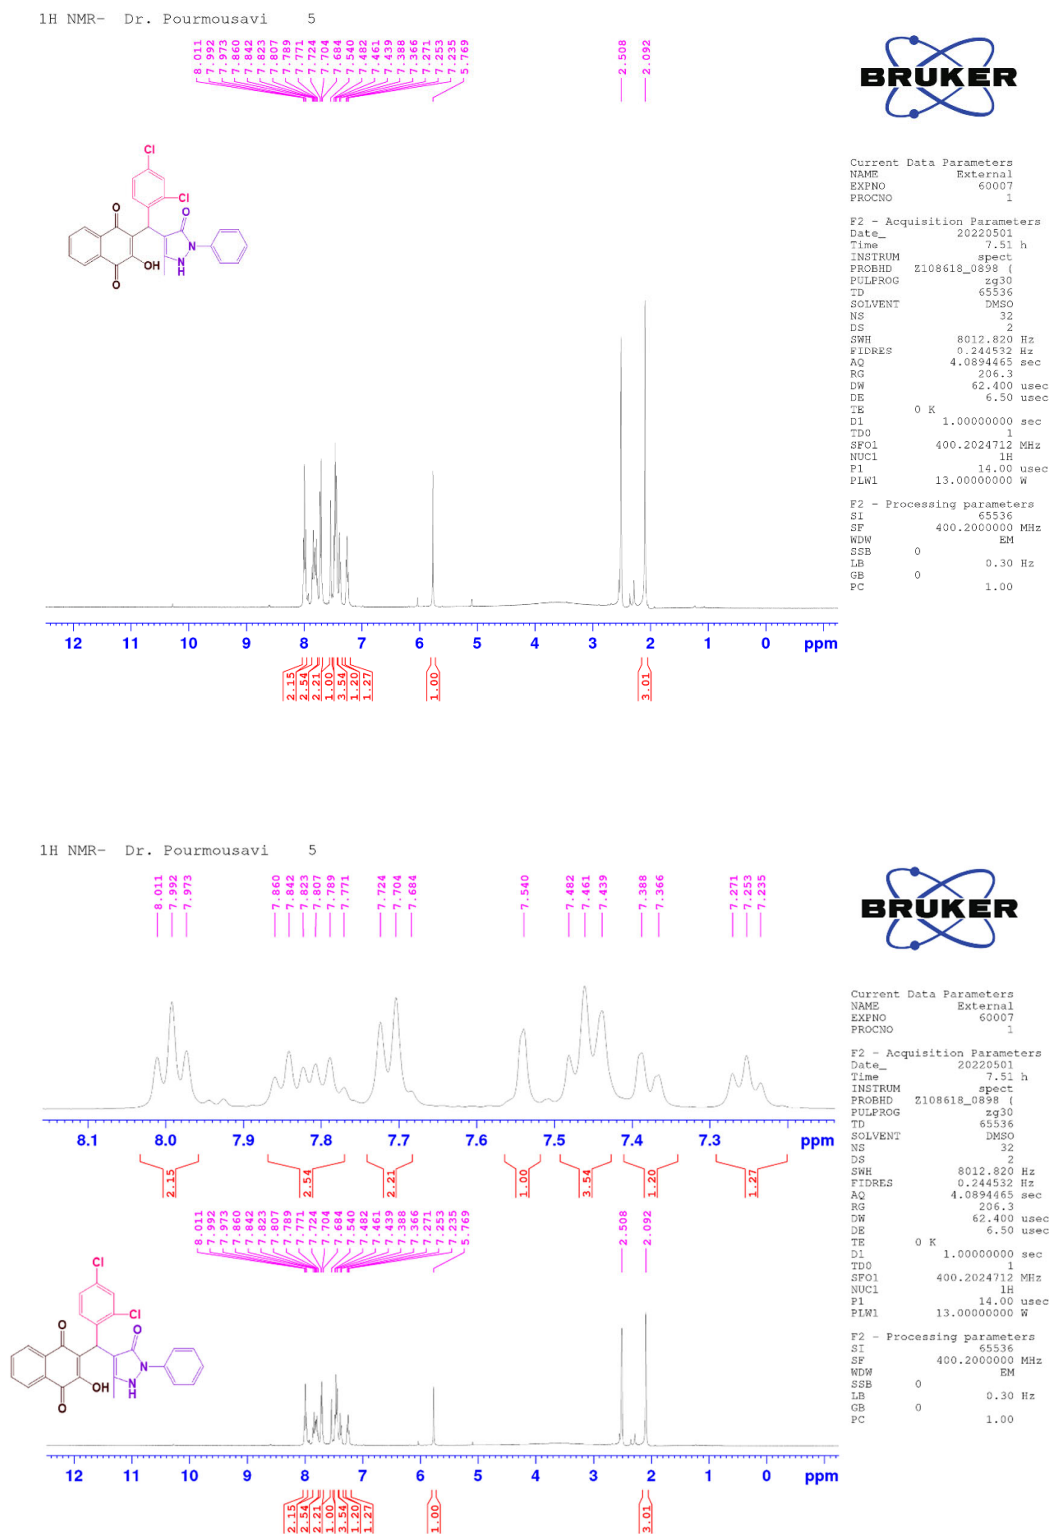Figure S12. <sup>1</sup>H-NMR spectrum of 4l.

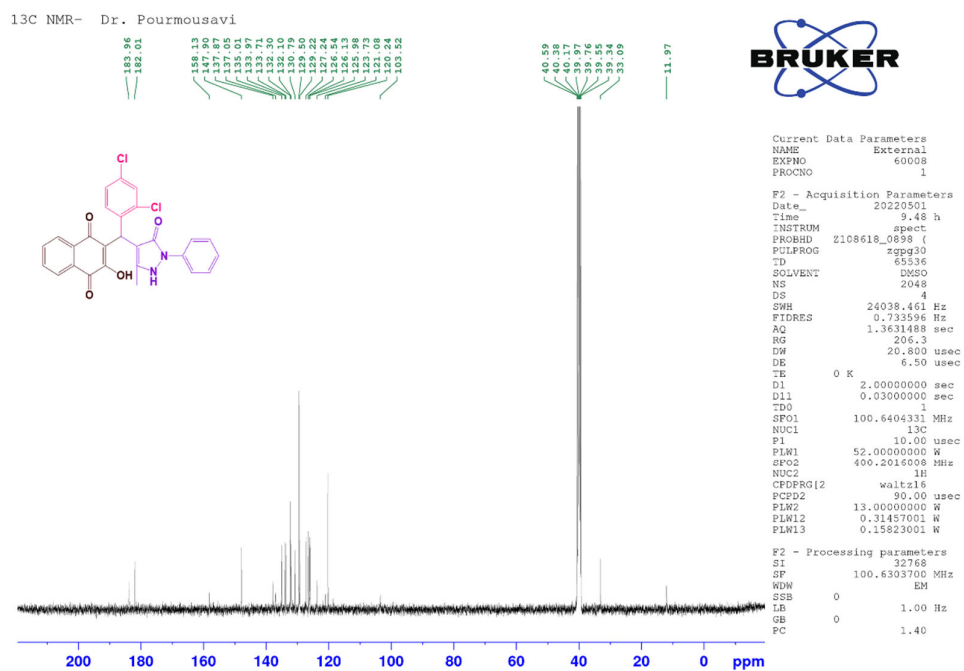Figure S13. <sup>13</sup>C-NMR spectrum of 4l.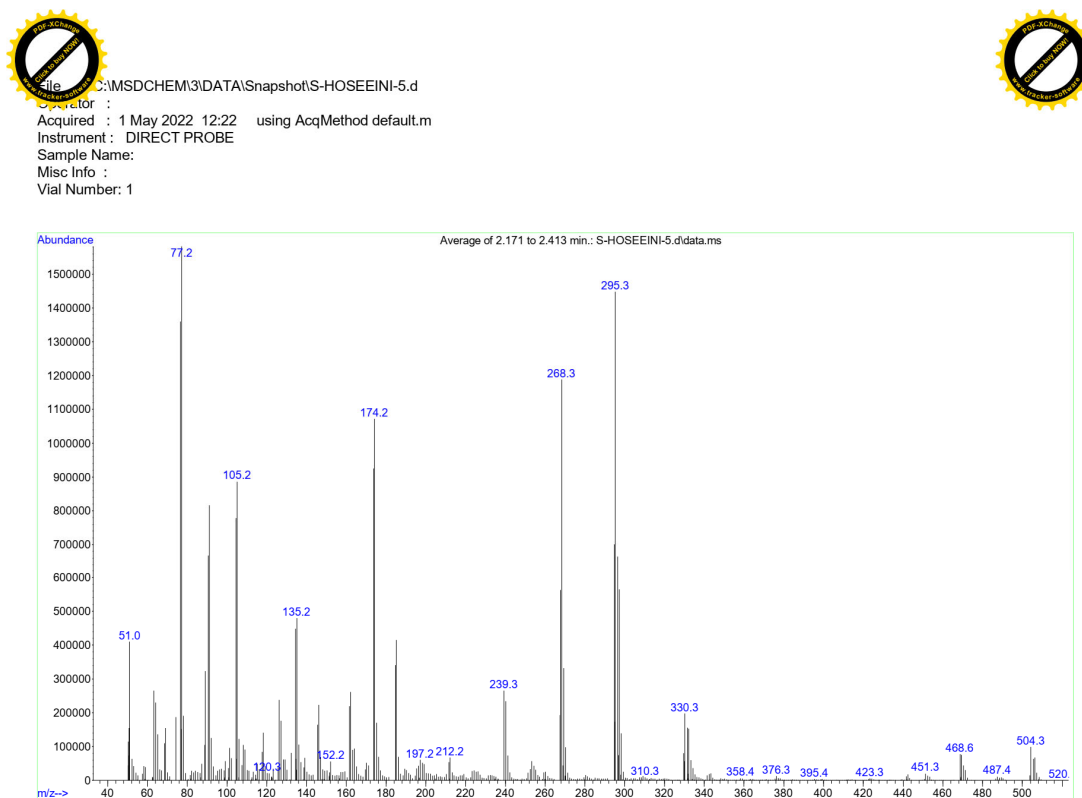

Figure S14. MASS Spectrum of 4l.

<sup>1</sup>H NMR- Dr. Pourmousavi 2

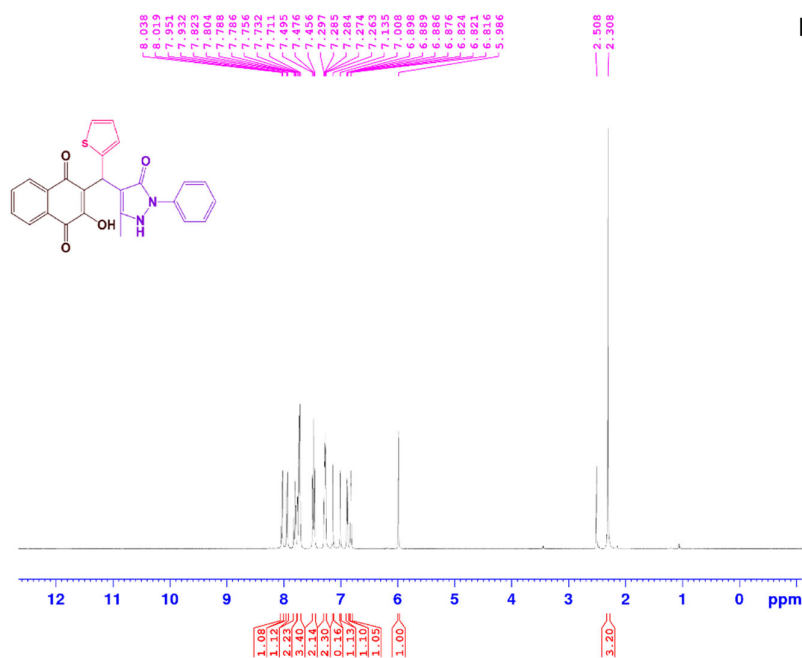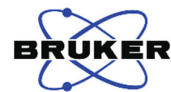

Current Data Parameters  
 NAME Dr. Pourmousavi  
 EXPNO 60001  
 PROCNO 1

F2 - Acquisition Parameters  
 Date\_ 20220430  
 Time 15.23 h  
 INSTRUM spect  
 PROBD Z108618\_0898 (   
 PULPROG zg30  
 TD 65536  
 SOLVENT DMSO  
 NS 16  
 DS 2  
 SWH 8012.820 Hz  
 FIDRES 0.244532 Hz  
 AQ 4.0894465 sec  
 RG 103.76  
 DW 62.400 usec  
 DE 6.50 usec  
 TE 0 K  
 D1 1.00000000 sec  
 TD0 1  
 SFO1 400.2024712 MHz  
 NUC1 1H  
 P1 16.00 usec  
 PLW1 13.00000000 W

F2 - Processing parameters  
 SI 65536  
 SF 400.2000000 MHz  
 WDW EM  
 SSB 0  
 LB 0.30 Hz  
 GB 0  
 PC 1.00

<sup>1</sup>H NMR- Dr. Pourmousavi 2

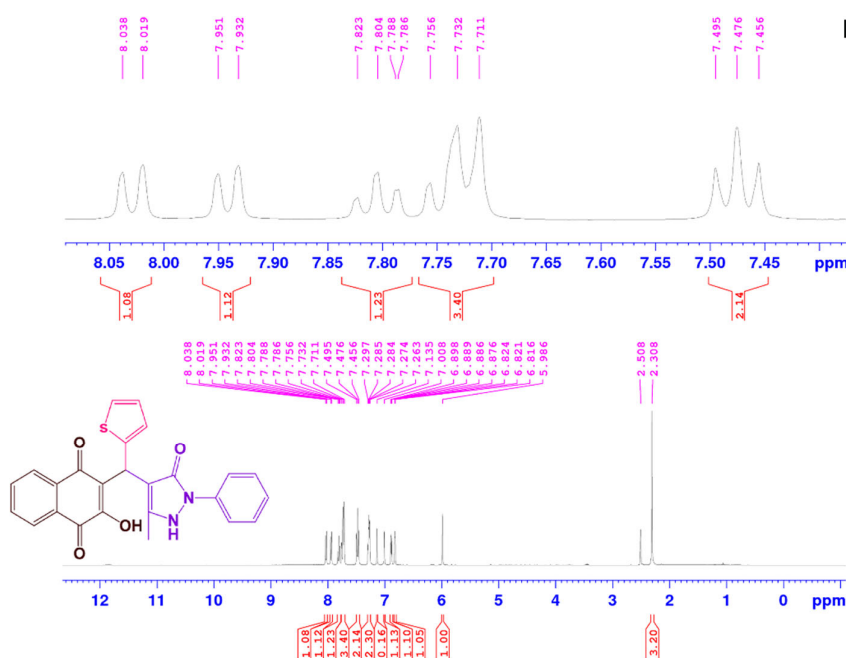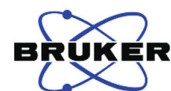

Current Data Parameters  
 NAME Dr. Pourmousavi  
 EXPNO 60001  
 PROCNO 1

F2 - Acquisition Parameters  
 Date\_ 20220430  
 Time 15.23 h  
 INSTRUM spect  
 PROBD Z108618\_0898 (   
 PULPROG zg30  
 TD 65536  
 SOLVENT DMSO  
 NS 16  
 DS 2  
 SWH 8012.820 Hz  
 FIDRES 0.244532 Hz  
 AQ 4.0894465 sec  
 RG 103.76  
 DW 62.400 usec  
 DE 6.50 usec  
 TE 0 K  
 D1 1.00000000 sec  
 TD0 1  
 SFO1 400.2024712 MHz  
 NUC1 1H  
 P1 16.00 usec  
 PLW1 13.00000000 W

F2 - Processing parameters  
 SI 65536  
 SF 400.2000000 MHz  
 WDW EM  
 SSB 0  
 LB 0.30 Hz  
 GB 0  
 PC 1.00

Figure S15. <sup>1</sup>H-NMR spectrum of 4n.

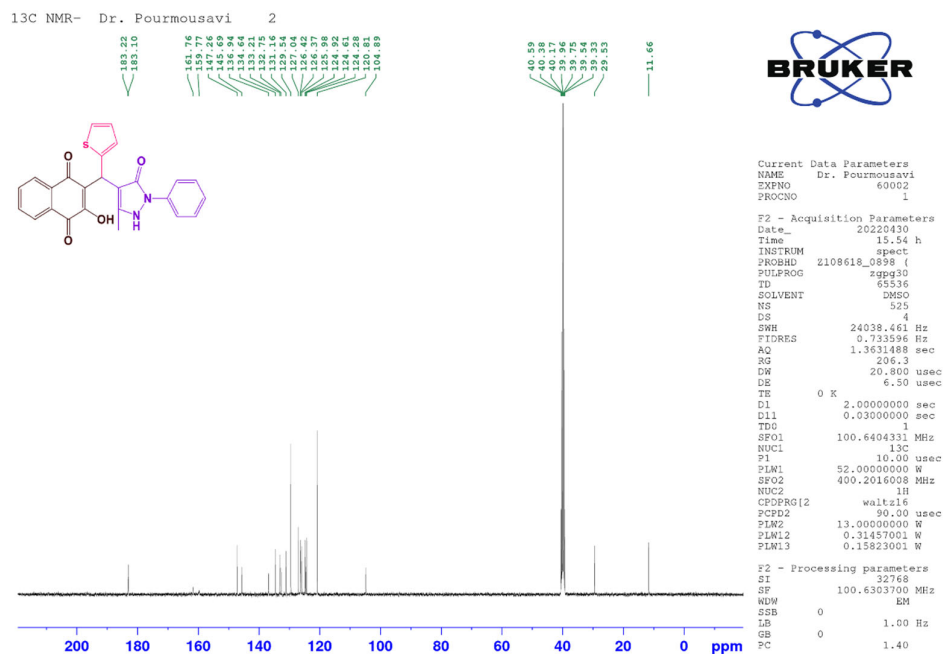Figure S16. <sup>13</sup>C-NMR spectrum of 4n.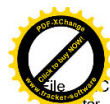

File: C:\MSDCHEM\3\DATA\Snapshots\BSB\S-HOSEINI-2.d  
 Operator: [BSB1]  
 Acquired: 1 May 2022 12:15 using AcqMethod default.m  
 Instrument: DIRECT PROBE  
 Sample Name:  
 Misc Info:  
 Vial Number: 1

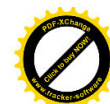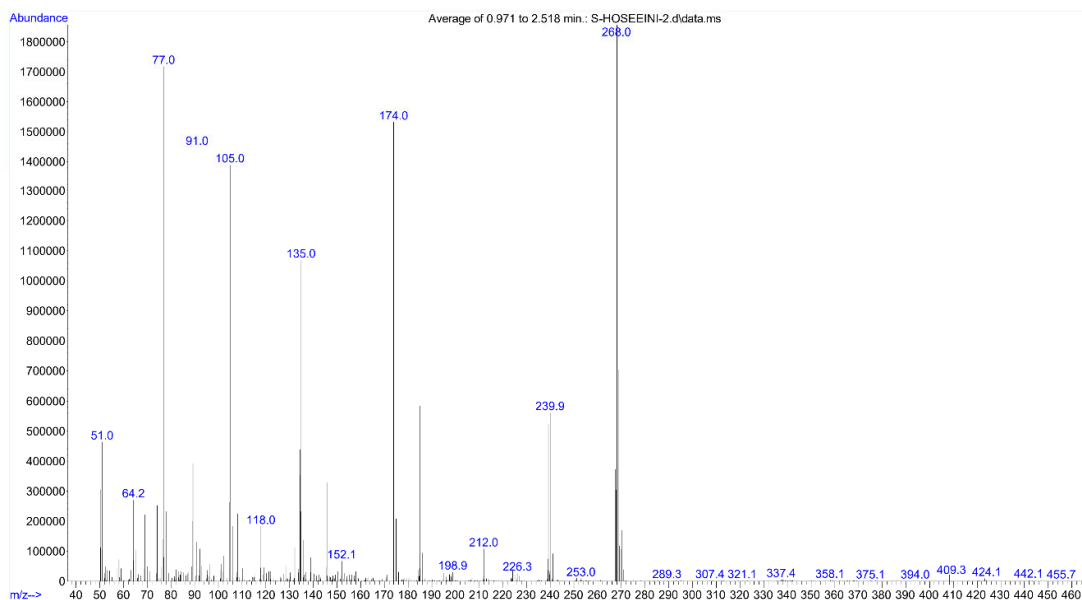

Figure S17. MASS Spectrum of 4n.



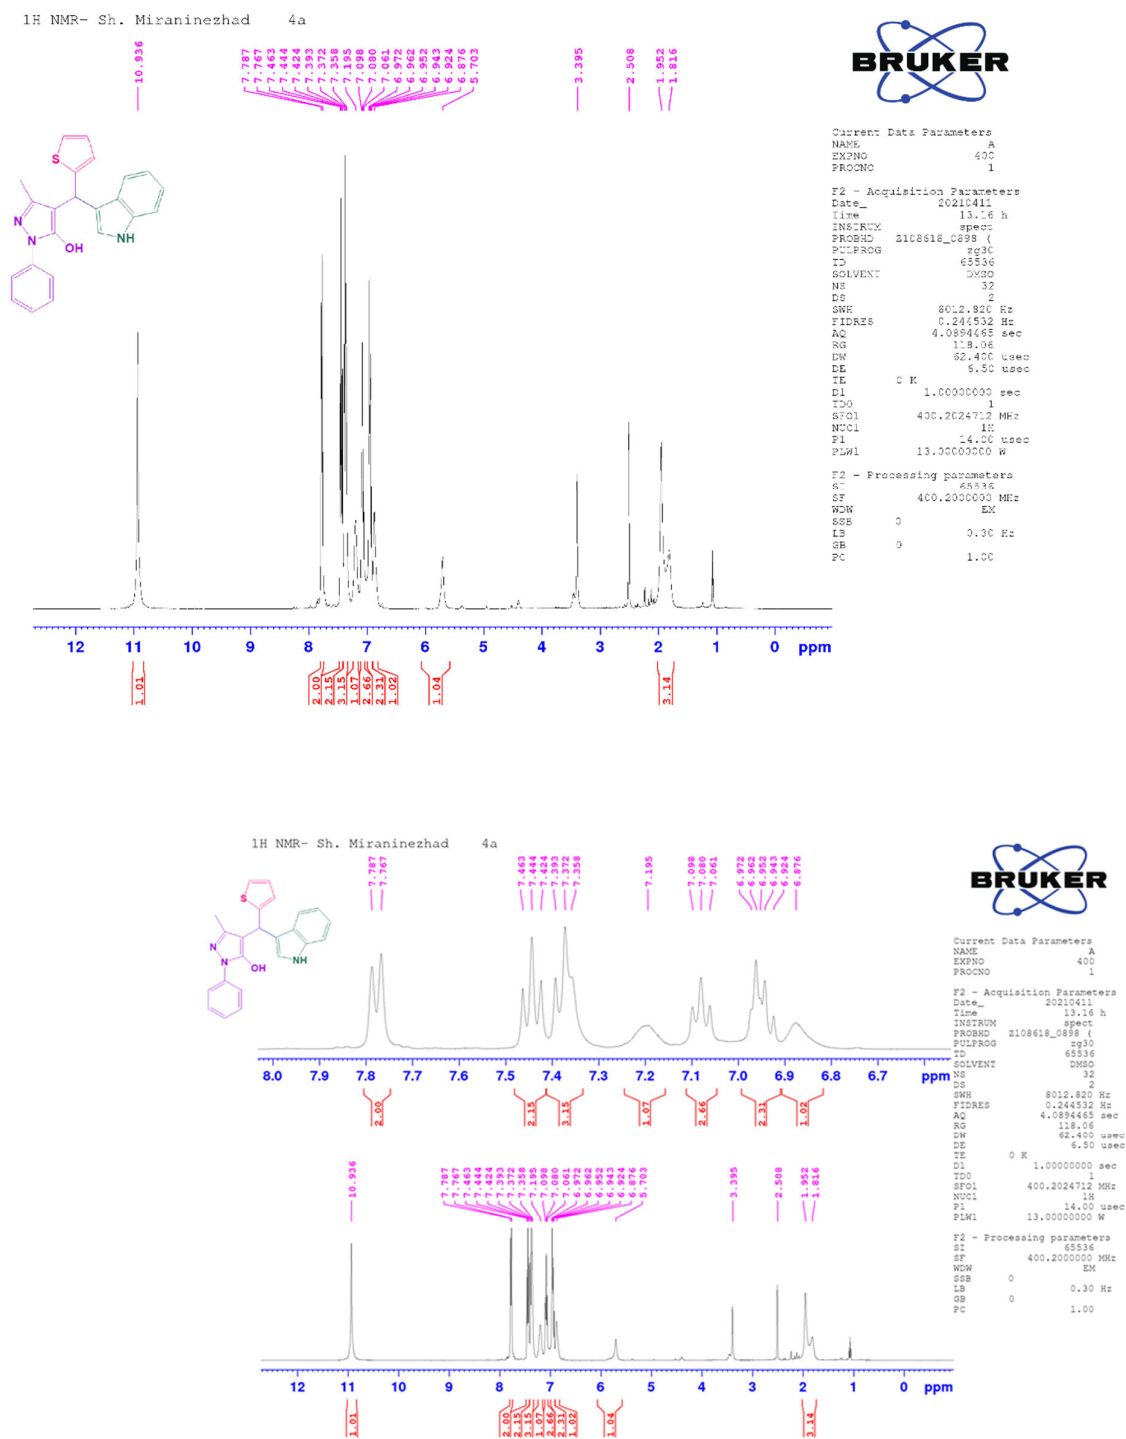Figure S18. <sup>1</sup>H-NMR spectrum of 6j.

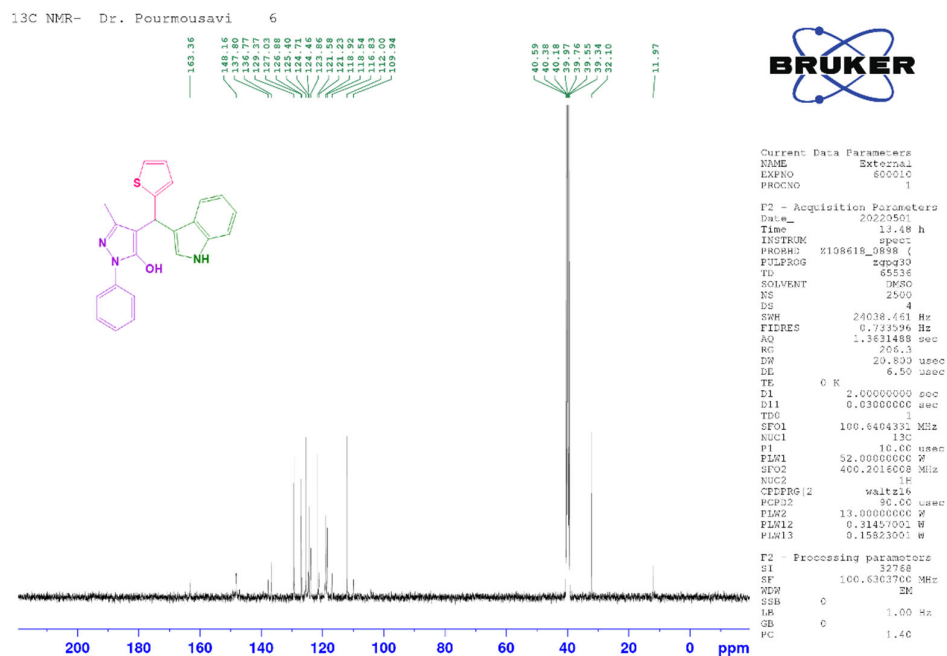Figure S19. <sup>13</sup>C-NMR spectrum of 4j.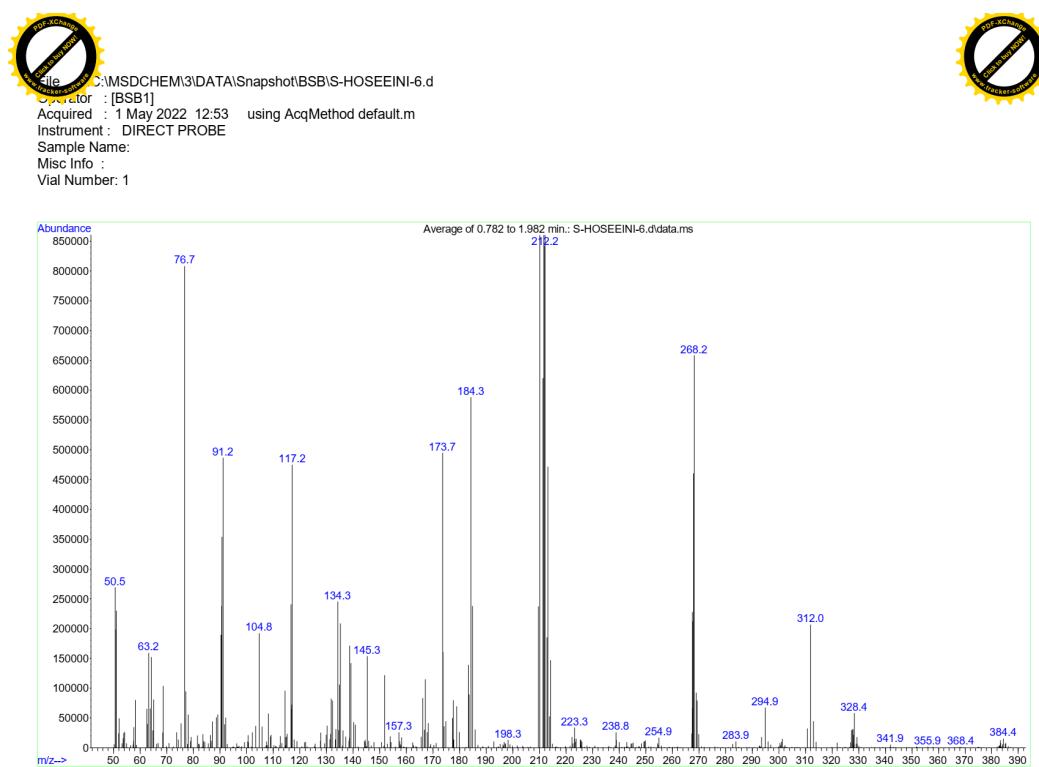

Figure S20. MASS Spectrum of 4o.

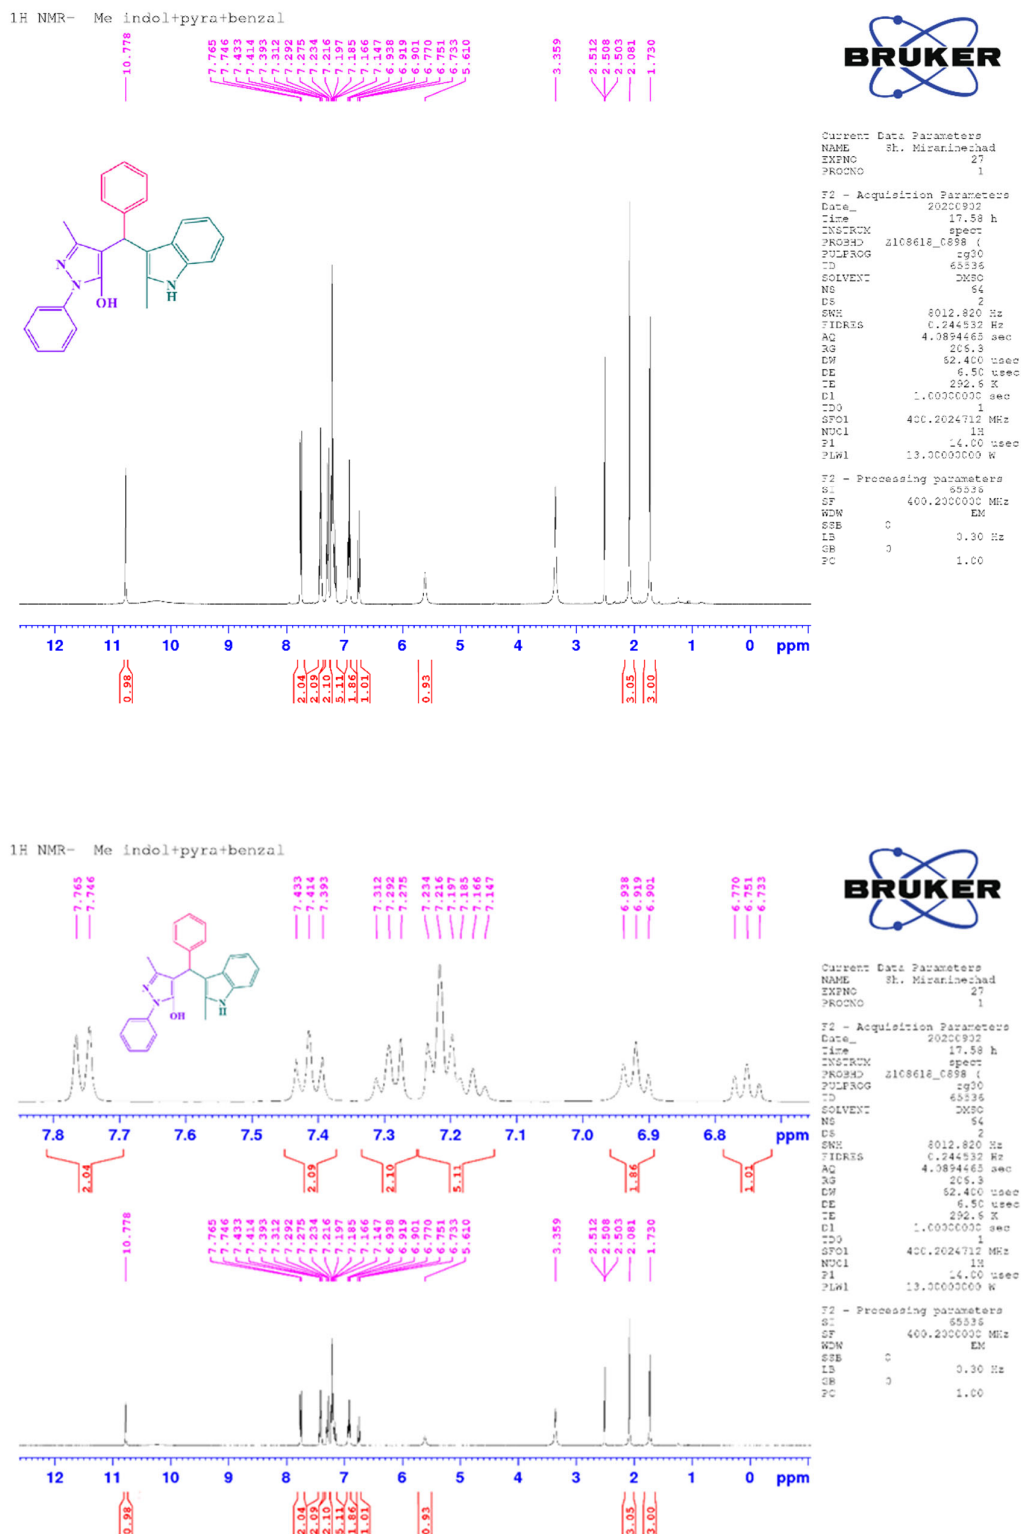Figure S21. <sup>1</sup>H-NMR spectrum of 6l.

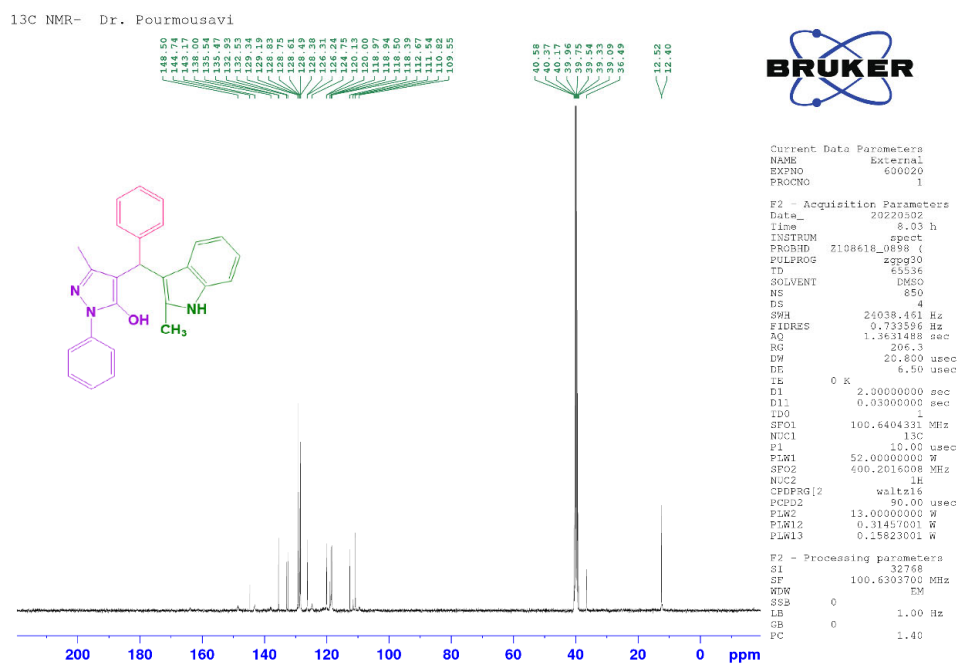Figure S22. <sup>13</sup>C-NMR spectrum of 6l.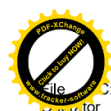

File: C:\MSDCHEM\3\DATA\Snapshot\S-HOSEEINI-11.d  
 Operator :  
 Acquired : 1 May 2022 12:44 using AcqMethod default.m  
 Instrument : DIRECT PROBE  
 Sample Name:  
 Misc Info :  
 Vial Number: 1

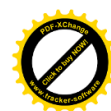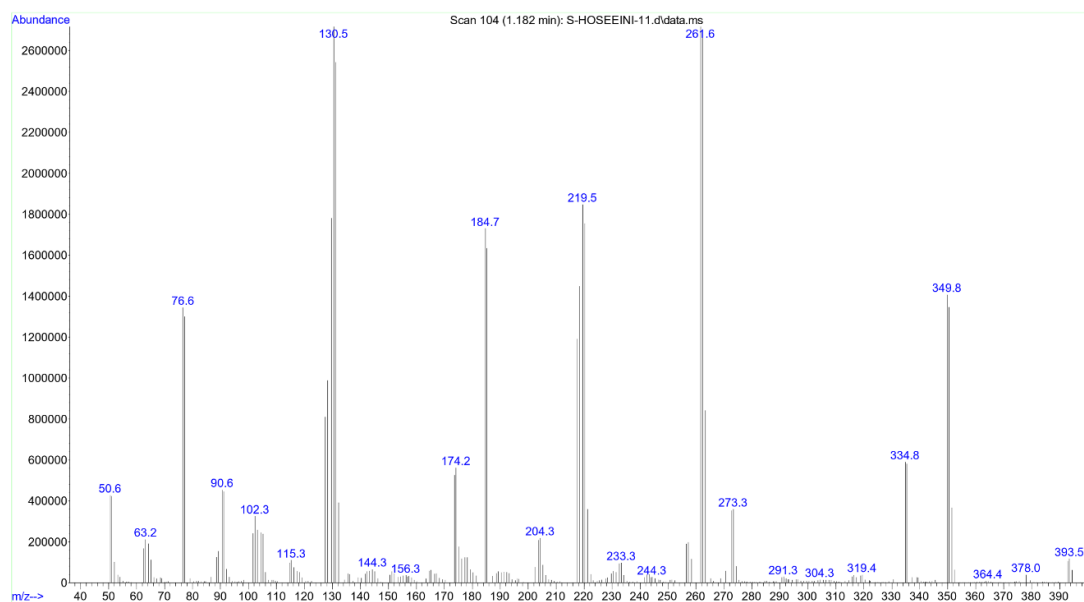

Figure S23. MASS Spectrum of 6l.

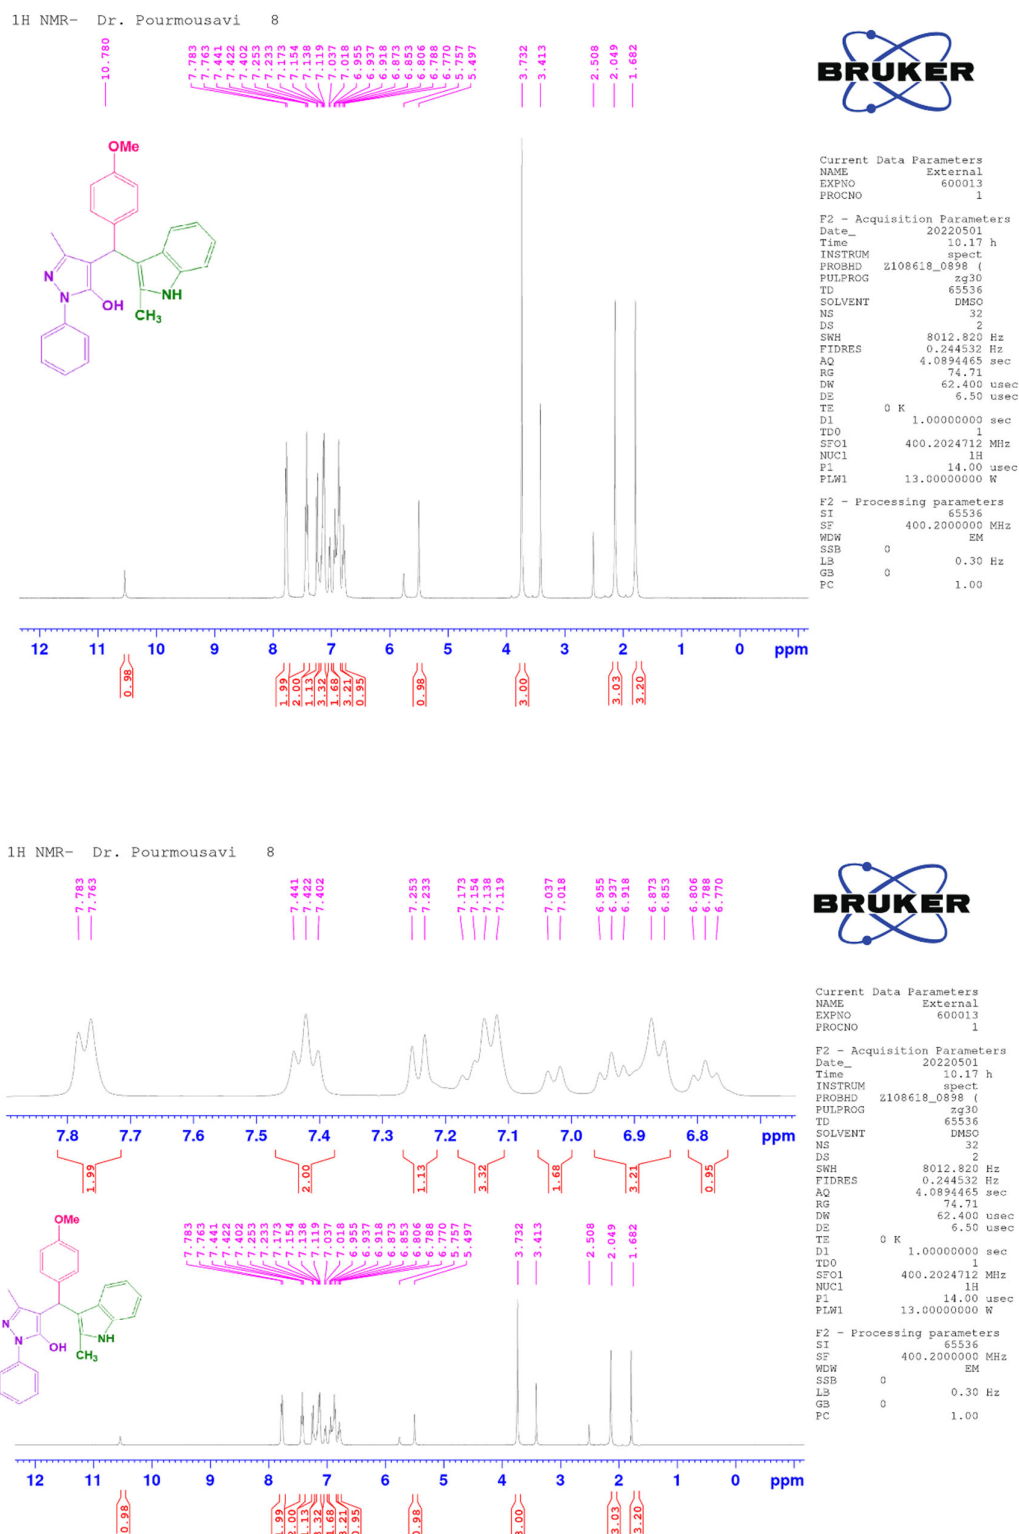Figure S24. <sup>1</sup>H-NMR spectrum of 6m.

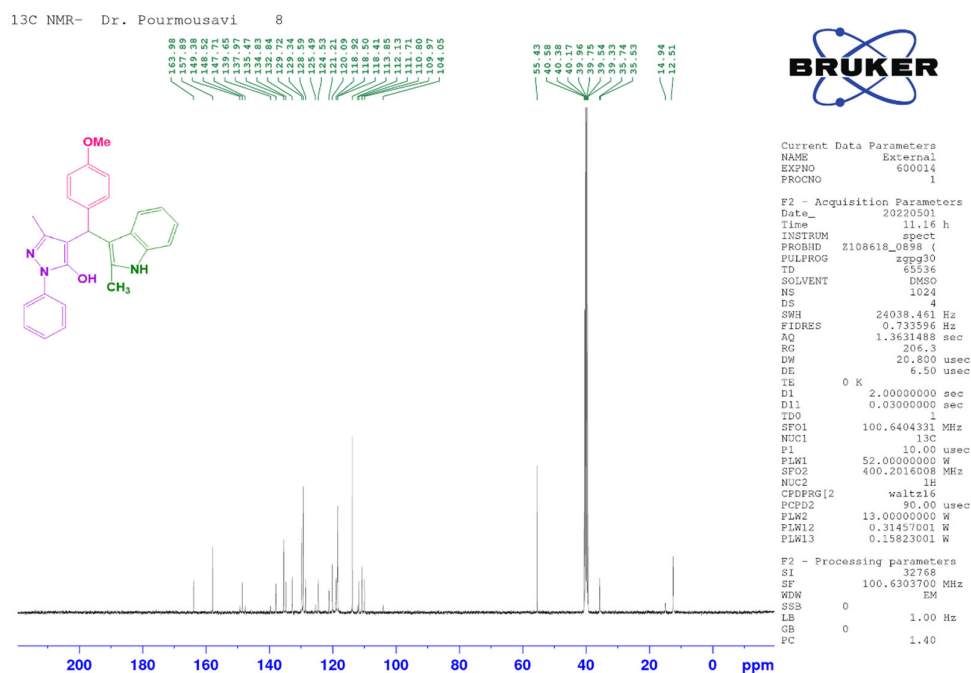Figure S25. <sup>13</sup>C-NMR spectrum of 6m.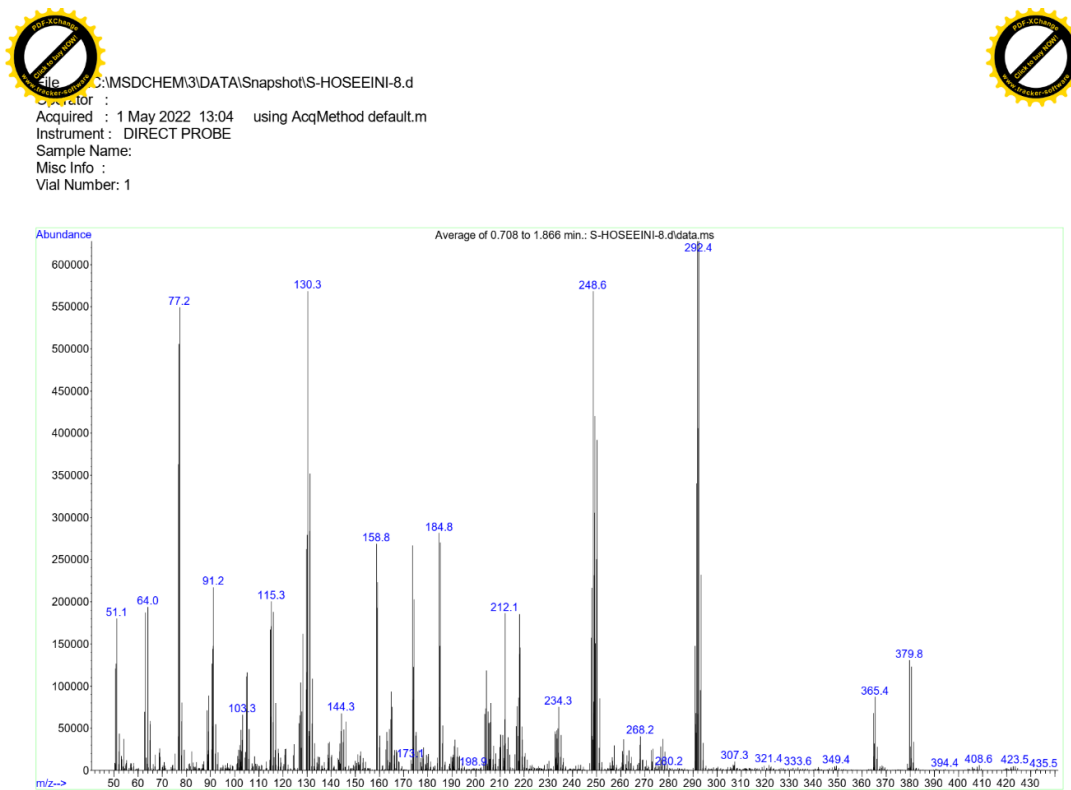

Figure S26. MASS Spectrum of 6m.

<sup>1</sup>H NMR— Dr. Pourmousavi

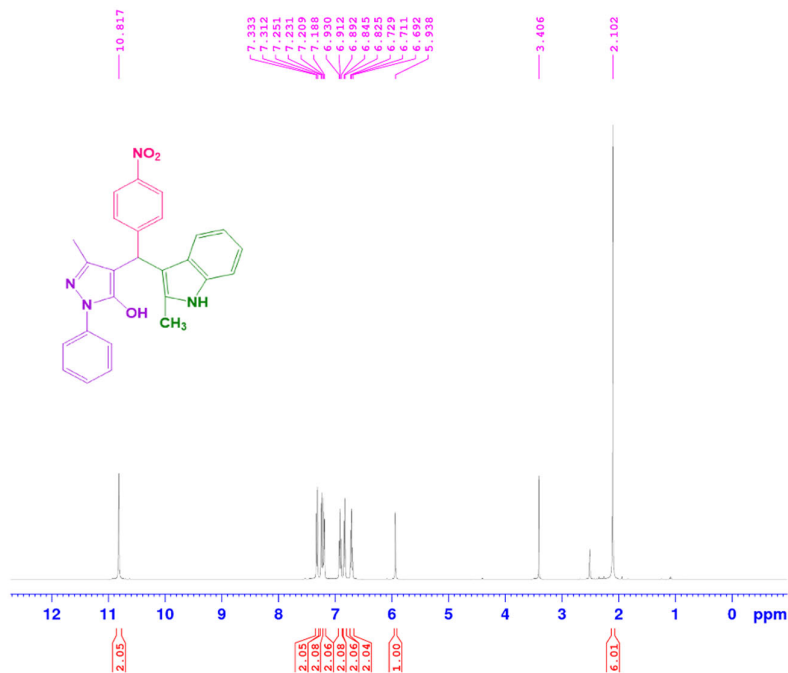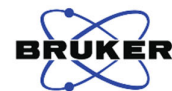

Current Data Parameters  
 NAME External  
 EXPNO 600011  
 PROCNO 1

F2 - Acquisition Parameters  
 Date\_ 20220501  
 Time 9.54 h  
 INSTRUM spect  
 PROBHD Z108618\_0898 (zg30)  
 PULPROG zg30  
 TD 65536  
 SOLVENT DMSO  
 NS 16  
 DS 2  
 SWH 8012.820 Hz  
 FIDRES 0.244532 Hz  
 AQ 4.0894465 sec  
 RG 93.36  
 DW 62.400 usec  
 DE 6.50 usec  
 TE 0 K  
 D1 1.00000000 sec  
 TDO 1  
 SFO1 400.2024712 MHz  
 NUC1 1H  
 P1 14.00 usec  
 PLW1 13.00000000 W

F2 - Processing parameters  
 SI 65536  
 SF 400.2000000 MHz  
 WDW EM  
 SSB 0  
 LB 0.30 Hz  
 GB 0  
 PC 1.00

<sup>1</sup>H NMR— Dr. Pourmousavi

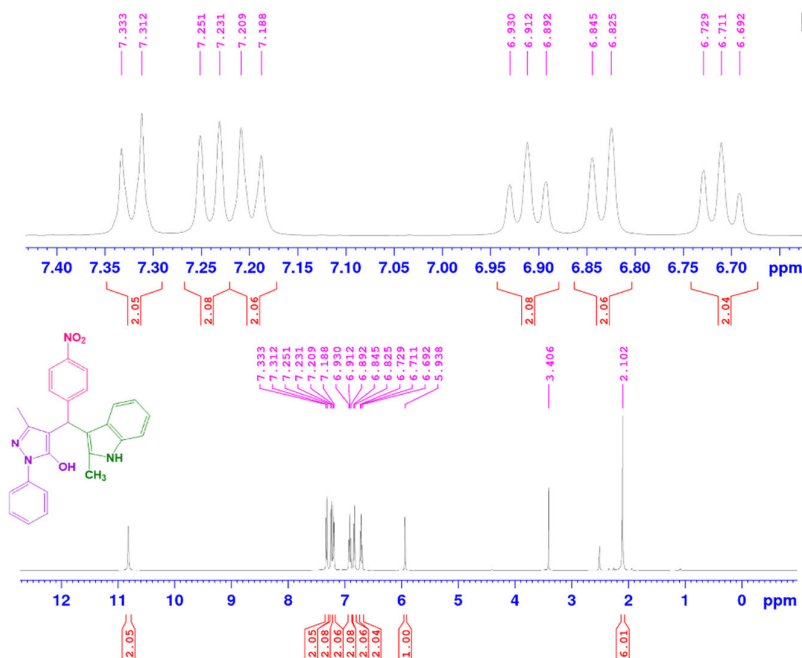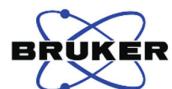

Current Data Parameters  
 NAME External  
 EXPNO 600011  
 PROCNO 1

F2 - Acquisition Parameters  
 Date\_ 20220501  
 Time 9.54 h  
 INSTRUM spect  
 PROBHD Z108618\_0898 (zg30)  
 PULPROG zg30  
 TD 65536  
 SOLVENT DMSO  
 NS 16  
 DS 2  
 SWH 8012.820 Hz  
 FIDRES 0.244532 Hz  
 AQ 4.0894465 sec  
 RG 93.36  
 DW 62.400 usec  
 DE 6.50 usec  
 TE 0 K  
 D1 1.00000000 sec  
 TDO 1  
 SFO1 400.2024712 MHz  
 NUC1 1H  
 P1 14.00 usec  
 PLW1 13.00000000 W

F2 - Processing parameters  
 SI 65536  
 SF 400.2000000 MHz  
 WDW EM  
 SSB 0  
 LB 0.30 Hz  
 GB 0  
 PC 1.00

Figure S27. <sup>1</sup>H-NMR spectrum of **6n**.

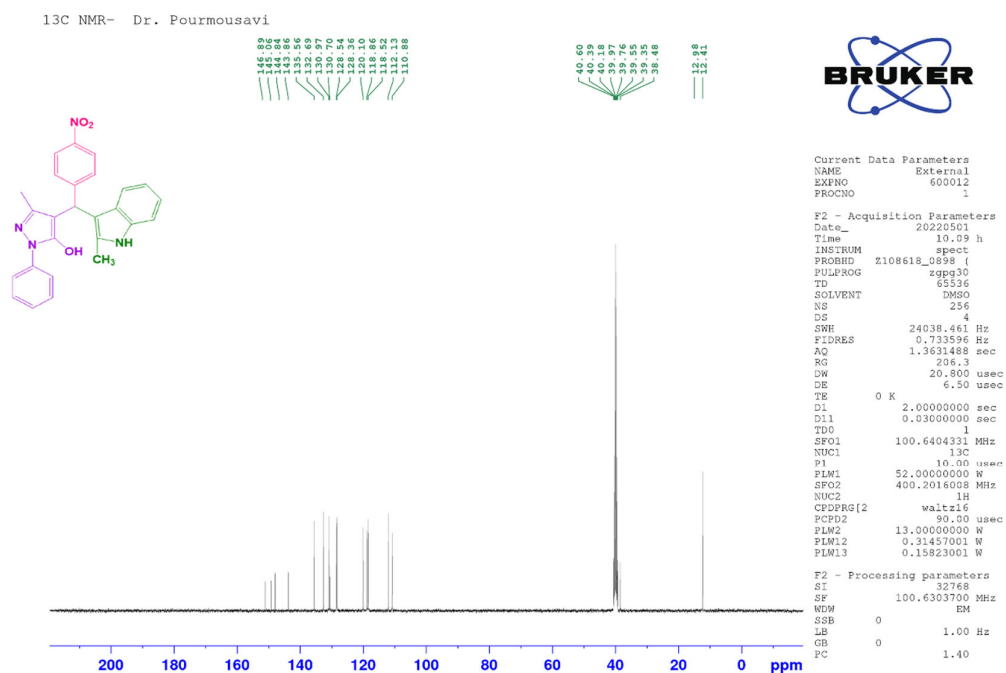Figure S28. <sup>13</sup>C-NMR spectrum of 6n.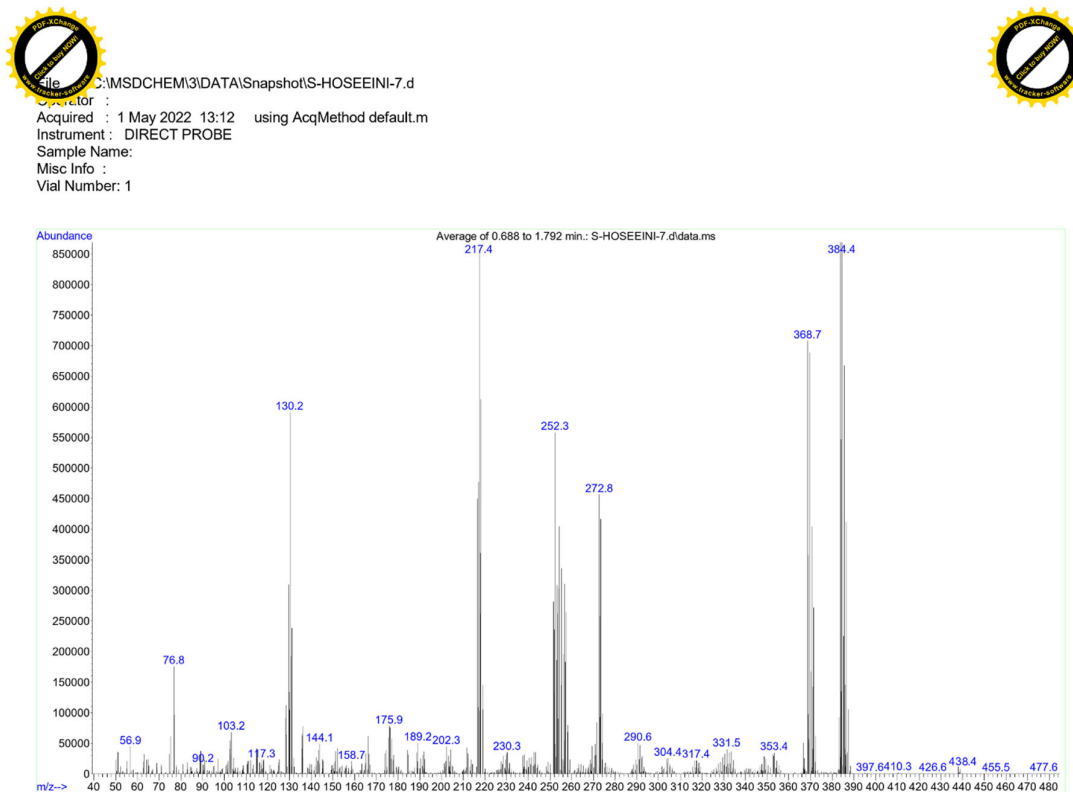

Figure S29. MASS Spectrum of 6n.



1H NMR- Dr. Pourmousavi

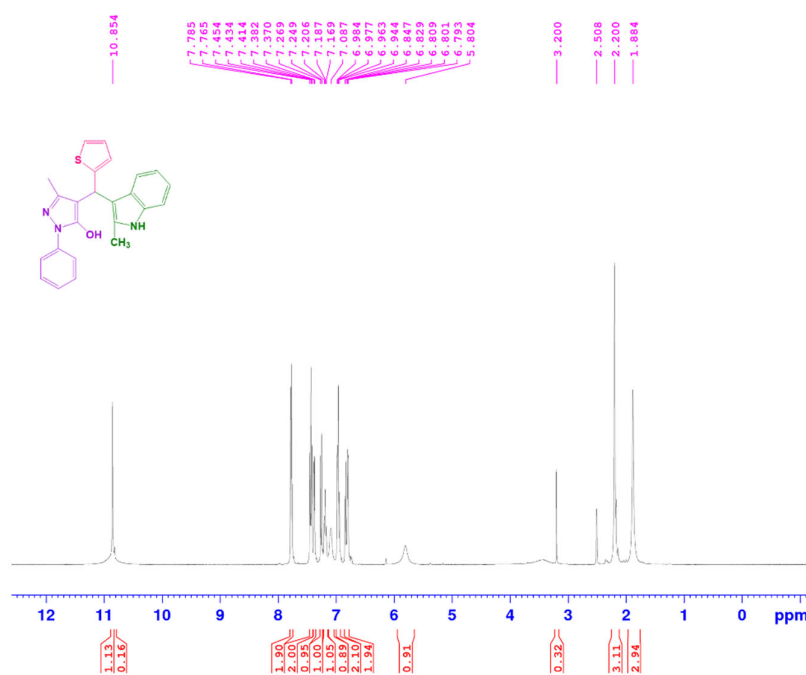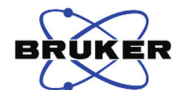

Current Data Parameters  
 NAME External  
 EXPNO 600015  
 PROCNO 1

F2 - Acquisition Parameters  
 Date\_ 20220501  
 Time 17.28 h  
 INSTRUM spect  
 PROBRD Z108618\_0898 (Zg30)  
 PULPROG zg30  
 TD 65536  
 SOLVENT DMSO  
 NS 16  
 DS 2  
 SWH 8012.820 Hz  
 FIDRES 0.244532 Hz  
 AQ 4.0894465 sec  
 RG 74.71  
 DW 62.400 usec  
 DE 6.50 usec  
 TE 0 K  
 D1 1.00000000 sec  
 TDO 1  
 SFO1 400.2024712 MHz  
 NUC1 1H  
 P1 14.00 usec  
 PLN1 13.00000000 W

F2 - Processing parameters  
 SI 65536  
 SF 400.2000000 MHz  
 WDW EM  
 SSB 0  
 LB 0.30 Hz  
 GB 0  
 PC 1.00

1H NMR- Dr. Pourmousavi

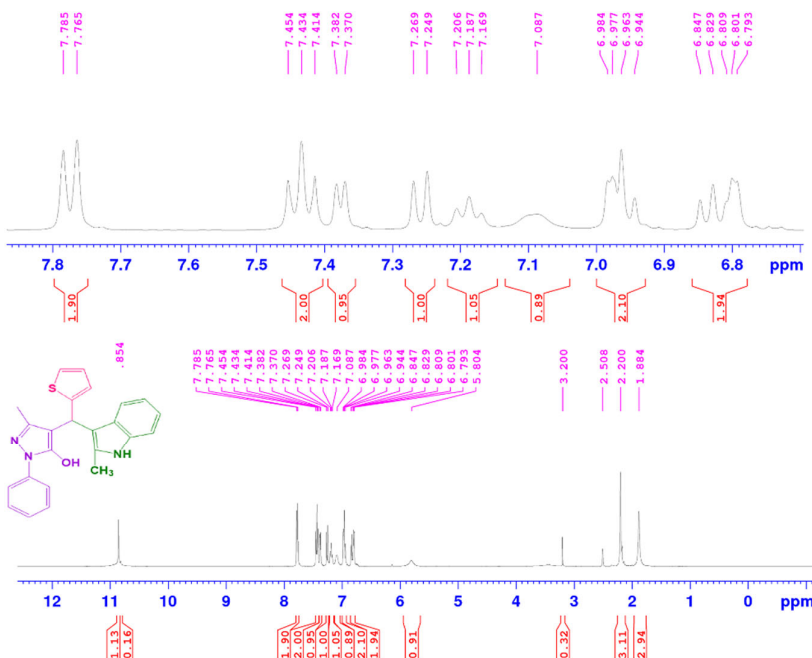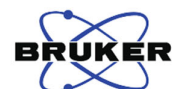

Current Data Parameters  
 NAME External  
 EXPNO 600015  
 PROCNO 1

F2 - Acquisition Parameters  
 Date\_ 20220501  
 Time 17.28 h  
 INSTRUM spect  
 PROBRD Z108618\_0898 (Zg30)  
 PULPROG zg30  
 TD 65536  
 SOLVENT DMSO  
 NS 16  
 DS 2  
 SWH 8012.820 Hz  
 FIDRES 0.244532 Hz  
 AQ 4.0894465 sec  
 RG 74.71  
 DW 62.400 usec  
 DE 6.50 usec  
 TE 0 K  
 D1 1.00000000 sec  
 TDO 1  
 SFO1 400.2024712 MHz  
 NUC1 1H  
 P1 14.00 usec  
 PLN1 13.00000000 W

F2 - Processing parameters  
 SI 65536  
 SF 400.2000000 MHz  
 WDW EM  
 SSB 0  
 LB 0.30 Hz  
 GB 0  
 PC 1.00

Figure S30. <sup>1</sup>H-NMR spectrum 60.

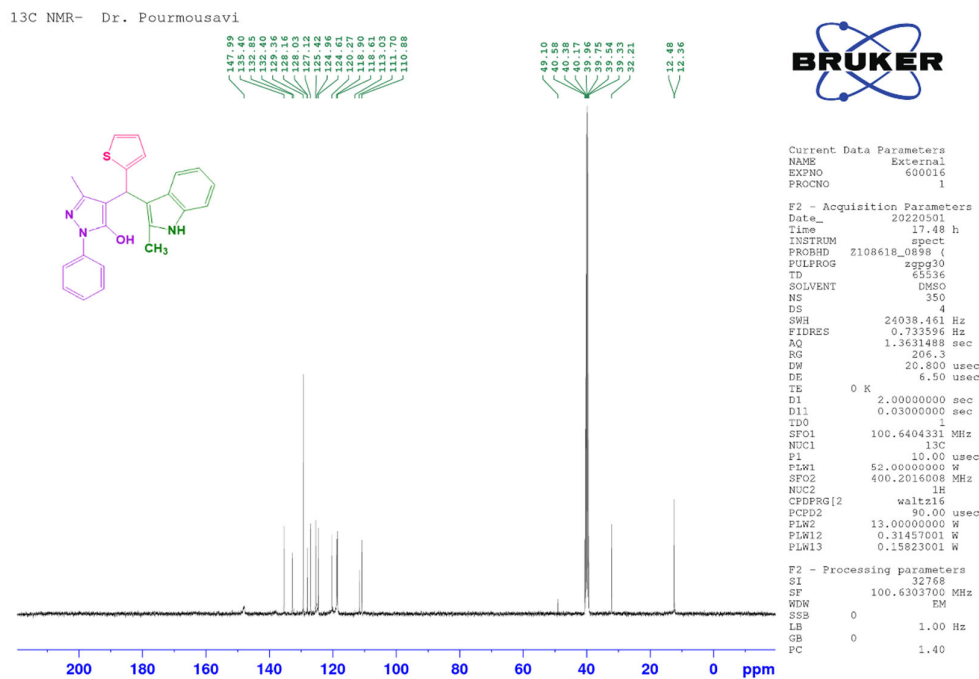Figure S31. <sup>13</sup>C-NMR spectrum of 60.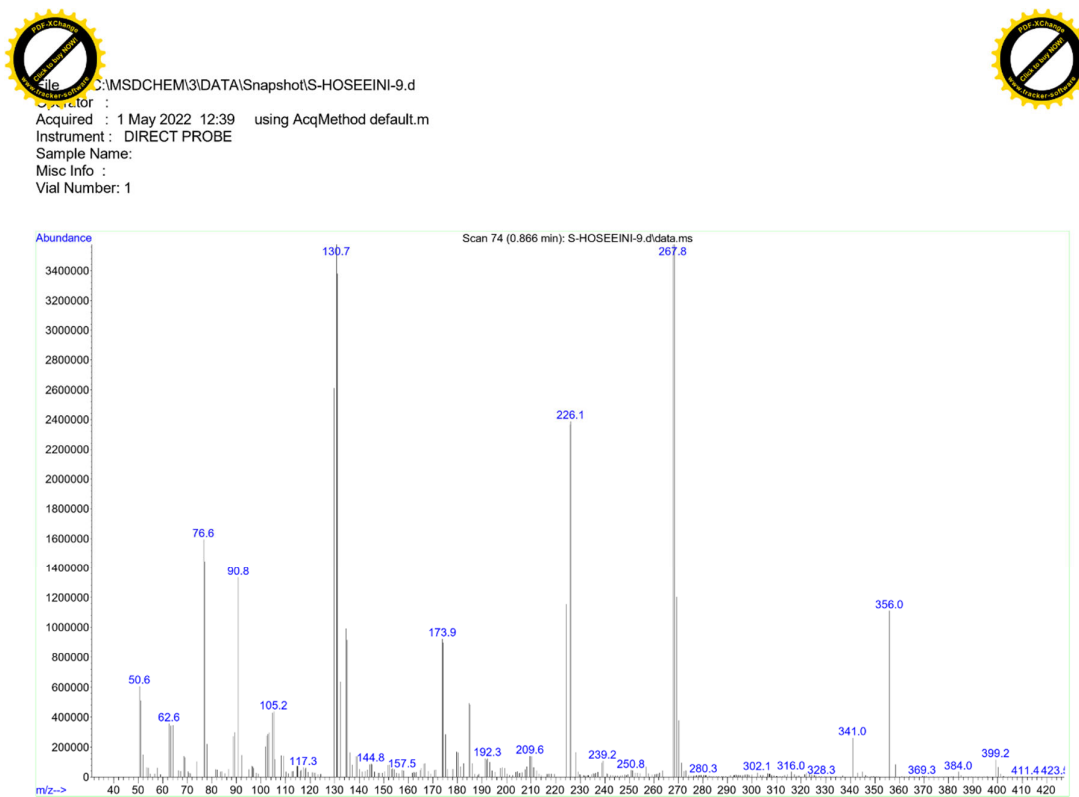

Figure S32. MASS Spectrum of 60.

<sup>1</sup>H NMR— Dr. Pourmousavi

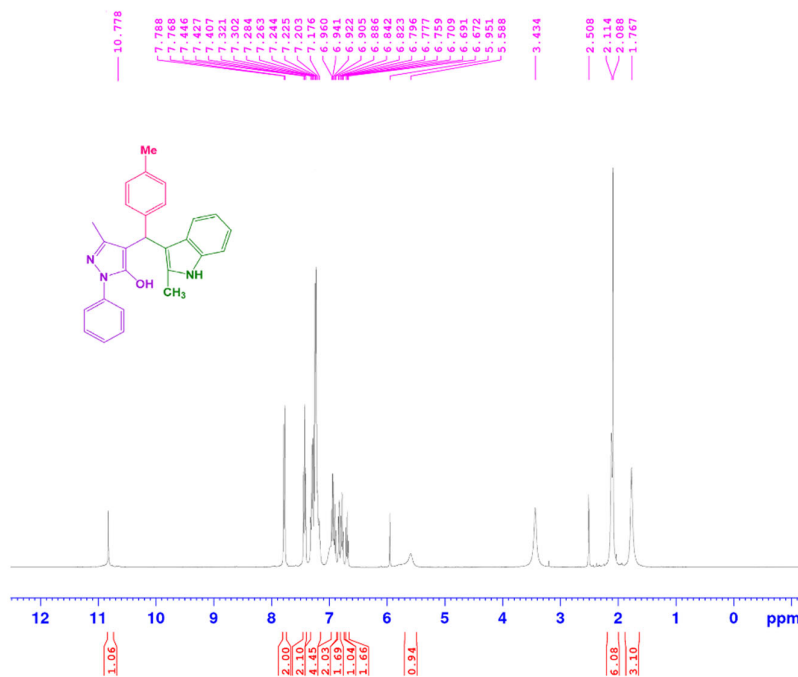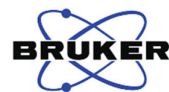

Current Data Parameters  
 NAME External  
 EXPNO 600019  
 PROCNO 1  
 F2 - Acquisition Parameters  
 Date\_ 20220502  
 Time 7.14 h  
 INSTRUM spect  
 PROBHD Z108618\_0898 (zg30)  
 PULPROG zg30  
 TD 65536  
 SOLVENT DMSO  
 NS 32  
 DS 2  
 SWH 8012.820 Hz  
 FIDRES 0.244532 Hz  
 AQ 4.0894465 sec  
 RG 63.53  
 DW 62.400 usec  
 DE 6.50 usec  
 TE 0 K  
 D1 1.00000000 sec  
 TDO 1  
 SFO1 400.2024712 MHz  
 NUC1 1H  
 P1 14.00 usec  
 PLM1 13.00000000 W  
 F2 - Processing parameters  
 SI 65536  
 SF 400.2000000 MHz  
 WDW EM  
 SSB 0  
 LB 0.30 Hz  
 GB 0  
 PC 1.00

<sup>1</sup>H NMR— Dr. Pourmousavi

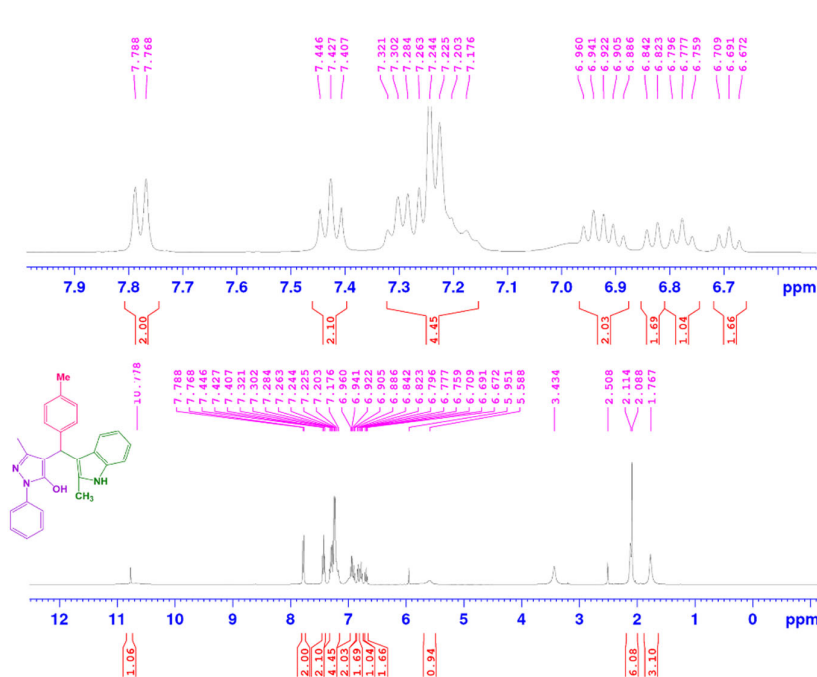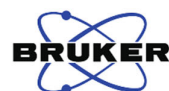

Current Data Parameters  
 NAME External  
 EXPNO 600019  
 PROCNO 1  
 F2 - Acquisition Parameters  
 Date\_ 20220502  
 Time 7.14 h  
 INSTRUM spect  
 PROBHD Z108618\_0898 (zg30)  
 PULPROG zg30  
 TD 65536  
 SOLVENT DMSO  
 NS 32  
 DS 2  
 SWH 8012.820 Hz  
 FIDRES 0.244532 Hz  
 AQ 4.0894465 sec  
 RG 63.53  
 DW 62.400 usec  
 DE 6.50 usec  
 TE 0 K  
 D1 1.00000000 sec  
 TDO 1  
 SFO1 400.2024712 MHz  
 NUC1 1H  
 P1 14.00 usec  
 PLM1 13.00000000 W  
 F2 - Processing parameters  
 SI 65536  
 SF 400.2000000 MHz  
 WDW EM  
 SSB 0  
 LB 0.30 Hz  
 GB 0  
 PC 1.00

Figure S33. <sup>1</sup>H-NMR spectrum 6p.

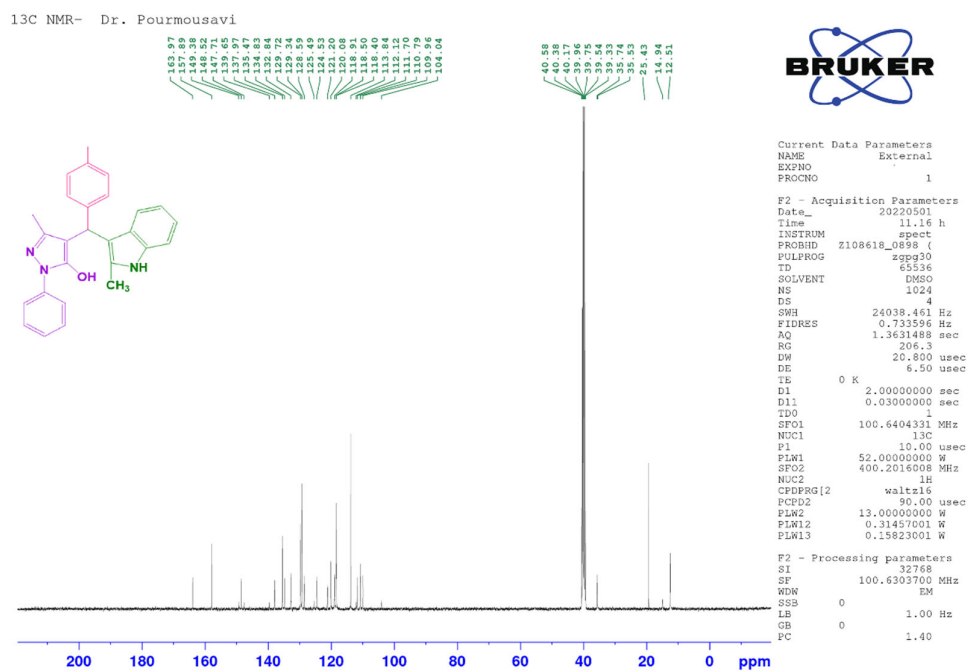Figure S34. <sup>13</sup>C-NMR spectrum of 6p.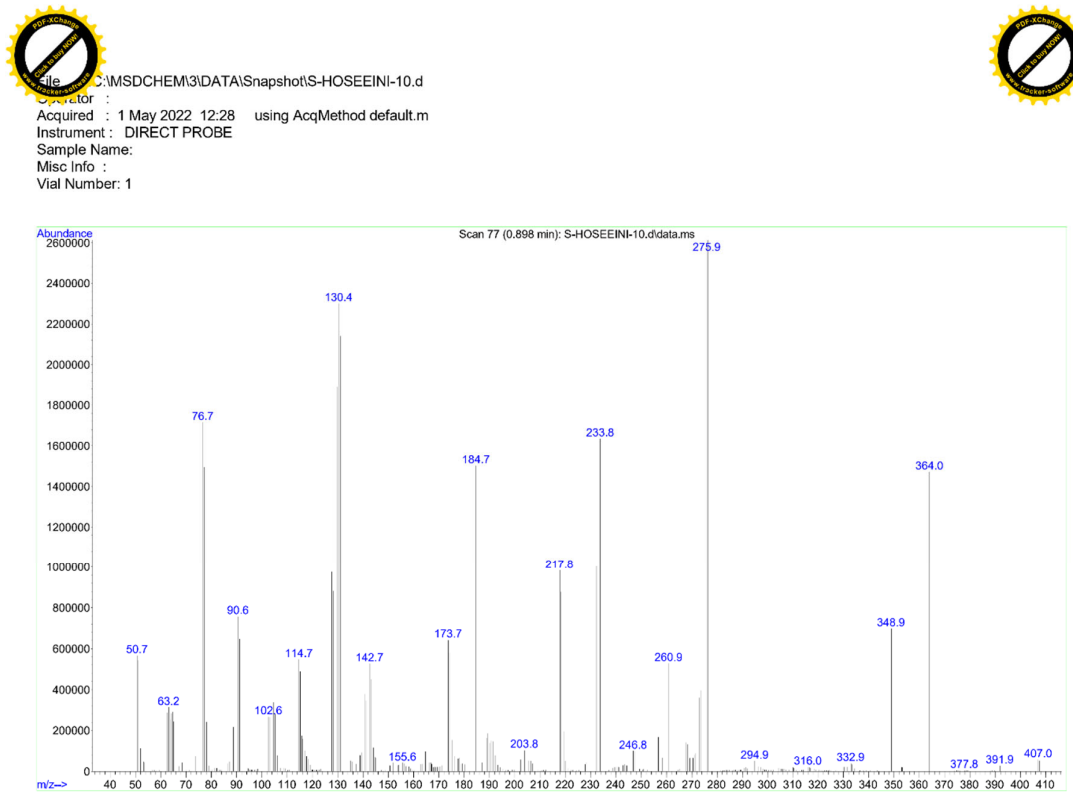

Figure S35. MASS Spectrum of 6p.
